# Supplementary material for: Distinct and overlapping gene regulatory networks in BMP- and HDAC-controlled cell fate determination in the embryonic forebrain
Source: PubMed Central journal article supplement (PMC3460768; doi:10.1186/1471-2164-13-298), 2012-07-02
Supplement: 1471-2164-13-298-S1.pdf [file 1471-2164-13-298-S1.pdf]

## **Supplementary Data:**

Table S1:  
25 Genes with the strongest Regulation of Expression after Treatment with **BMP2 6h**

| <b>top regulated Genes</b>                             | <b>Gene Symbol</b> | <b>Fold Change</b> | <b>Difference of Means</b> |
|--------------------------------------------------------|--------------------|--------------------|----------------------------|
| <b>Induced</b>                                         |                    |                    |                            |
| Wnt inhibitory factor 1                                | Wif1               | 107.77             | 397.32                     |
| connective tissue growth factor                        | Ctgf               | 32.22              | 728.34                     |
| MAD homolog 6 (Drosophila)                             | Smad6              | 26.68              | 585.58                     |
| gap junction protein, alpha 3                          | Gja3               | 26.18              | 112.25                     |
| noggin                                                 | Nog                | 25.14              | 2961.24                    |
| myocilin                                               | Myoc               | 20.14              | 118.14                     |
| atonal homolog 8 (Drosophila)                          | Atoh8              | 17.18              | 283.24                     |
| follistatin                                            | Fst                | 16.56              | 580.48                     |
| ADAMTS-like 2                                          | Adamtsl2           | 15.45              | 168.23                     |
| Mm,103566,1                                            |                    | 12.3               | 103.04                     |
| DIRAS family, GTP-binding RAS-like 2                   | Diras2             | 12.12              | 350.37                     |
| RIKEN cDNA A730054J21 gene                             | A730054J21Rik      | 10.66              | 424.79                     |
| kinesin family member 26B                              | Kif26b             | 10.6               | 308.18                     |
| growth arrest and DNA-damage-inducible 45 beta         | Gadd45b            | 9.84               | 246.59                     |
| cyclin-dependent kinase inhibitor 1C (P57)             | Cdkn1c             | 9.28               | 1572.64                    |
| follistatin                                            | Fst                | 9.2                | 132.86                     |
| tumor necrosis factor receptor superfamily, member 12a | Tnfrsf12a          | 9.04               | 254.32                     |
| 3'-phosphoadenosine 5'-phosphosulfate synthase 2       | Papss2             | 8.87               | 393.89                     |
| Mm,197257,1                                            |                    | 8.6                | 186.26                     |
| <b>Supressed</b>                                       |                    |                    |                            |
| 3'-phosphoadenosine 5'-phosphosulfate synthase 2       | Papss2             | 7.77               | 555.95                     |
| bone morphogenetic protein 4                           | Bmp4               | -9.01              | -865.31                    |
| protein tyrosine phosphatase, receptor type, E         | Ptpre              | -11.36             | -308.04                    |
| expressed sequence AI414108                            | AI414108           | -14.08             | -338.03                    |
| chondroitin sulfate proteoglycan 4                     | Cspg4              | -14.6              | -159.76                    |
| protein tyrosine phosphatase, receptor type, E         | Ptpre              | -18.37             | -762.52                    |

Table S2:

25 Genes with the strongest Regulation of Expression after Treatment with **BMP2 24h**

| <b>top regulated Genes</b>                                                  | <b>Gene Symbol</b> | <b>Fold Change</b> | <b>Difference of Means</b> |
|-----------------------------------------------------------------------------|--------------------|--------------------|----------------------------|
| <b>Induced</b>                                                              |                    |                    |                            |
| Wnt inhibitory factor 1                                                     | Wif1               | 273.64             | 1325.14                    |
| gap junction protein, alpha 3                                               | Gja3               | 255.35             | 738.33                     |
| Mm,103566,1                                                                 |                    | 101.11             | 633.16                     |
| DIRAS family, GTP-binding RAS-like 2                                        | Diras2             | 99.94              | 3457.18                    |
| tumor necrosis factor receptor superfamily, member 13c                      | Tnfrsf13c          | 98.72              | 369.56                     |
| neuropeptide VF precursor                                                   | Npvf               | 85.65              | 847.12                     |
| serine (or cysteine) peptidase inhibitor, clade F, member 1                 | Serpinf1           | 83.55              | 1704.52                    |
| lysozyme 1                                                                  | Lyz1               | 82.55              | 202.57                     |
| ADAMTS-like 2                                                               | Adamtsl2           | 79.26              | 517.68                     |
| predicted gene 6041                                                         | Gm6041             | 67.14              | 300.86                     |
| serine (or cysteine) peptidase inhibitor, clade F, member 1                 | Serpinf1           | 50.46              | 829.96                     |
| fibromodulin                                                                | Fmod               | 44.97              | 357.44                     |
| cell death-inducing DNA fragmentation factor, alpha subunit-like effector A | Cidea              | 40.68              | 922.63                     |
| apelin receptor                                                             | Aplnr              | 40.55              | 246.76                     |
| RIKEN cDNA A730054J21 gene                                                  | A730054J21Rik      | 37.09              | 939.5                      |
| expressed sequence C86753                                                   | C86753             | 37.09              | 274.31                     |
| family with sequence similarity 101, member A                               | Fam101a            | 36.03              | 276.81                     |
| lysozyme 1                                                                  | Lyz1               | 35.27              | 114.69                     |
| gastrulation brain homeobox 2                                               | Gbx2               | 33.79              | 141.95                     |
| predicted gene 10001                                                        | Gm10001            | 32.41              | 1265.2                     |
| secretogranin II                                                            | Scg2               | 29.99              | 871.22                     |
| MAD homolog 6 (Drosophila)                                                  | Smad6              | 29.71              | 807.36                     |
| predicted gene 14134                                                        | Gm14134            | 29.55              | 248.19                     |
| <b>Supressed</b>                                                            |                    |                    |                            |
| G protein-coupled receptor 17                                               | Gpr17              | -30.9              | -3832.45                   |
| bone morphogenetic protein 4                                                | Bmp4               | -34.17             | -1166.86                   |

Table S3:

## 25 Genes with the strongest Regulation of Expression after Treatment with TSA 6h

| top regulated Genes                                  | Gene Symbol               | Fold Change | Difference of Means |
|------------------------------------------------------|---------------------------|-------------|---------------------|
| <b>Induced</b>                                       |                           |             |                     |
| Ras association (RalGDS/AF-6) domain family member 4 | Rassf4                    | 28.23       | 188.97              |
| Mm,40442,1                                           | Efna3                     | 26.26       | 316.59              |
| Histone cluster 1, H1e                               | Hist1h1e                  | 25.22       | 1183.64             |
| immediate early response 3                           | Ier3                      | 23.54       | 171.57              |
| Histone cluster 1, H1e                               | Hist1h1e                  | 21.38       | 422.51              |
| interferon zeta                                      | Ifnz                      | 17.79       | 242.82              |
| ephrin A3 /// similar to Ephrin A3                   | Efna3 ///<br>LOC100046031 | 17.24       | 734.87              |
| FXYP domain-containing ion transport regulator 7     | Fxyd7                     | 17.14       | 125.99              |
| transcription factor-like 5 (basic helix-loop-helix) | Tcfl5                     | 16.43       | 325.15              |
| testis expressed gene 15                             | Tex15                     | 16.33       | 158.68              |
| similar to Tescalcin /// tescalcin                   | LOC100047138<br>/// Tesc  | 13.81       | 301.85              |
| protease, serine, 16 (thymus)                        | Prss16                    | 13.1        | 118.15              |
| desert hedgehog                                      | Dhh                       | 12.84       | 167.56              |
| insulin-like 6                                       | Insl6                     | 12.82       | 184.99              |
| receptor accessory protein 6                         | Reep6                     | 12.23       | 428.33              |
| heat shock protein 1B                                | Hspa1b                    | 12.11       | 760.82              |
| similar to Y box protein 2 /// Y box protein 2       | LOC100045903<br>/// Ybx2  | 11.99       | 130.57              |
| heat shock protein 1A                                | Hspa1a                    | 11.83       | 400.14              |
| <b>Supressed</b>                                     |                           |             |                     |
| protein kinase C, theta                              | Prkcq                     | -11.82      | -820.17             |
| adenosine monophosphate deaminase 3                  | Ampd3                     | -12.29      | -393.95             |
| RIKEN cDNA 9630013A20 gene                           | 9630013A20Rik             | -12.52      | -936.73             |
| RIKEN cDNA A230069A22 gene                           | A230069A22Rik             | -14.4       | -723.81             |
| breast carcinoma amplified sequence 1                | Bcas1                     | -14.56      | -327.11             |
| H2A histone family, member Y2                        | H2afy2                    | -14.59      | -536.91             |
| distal-less homeobox 1, antisense                    | Dlx1as                    | -19.97      | -209.32             |

Table S4:

25 Genes with the strongest Regulation of Expression after Treatment with TSA 24h

| <b>top regulated Genes</b>                                      | <b>Gene Symbol</b>          | <b>Fold Change</b> | <b>Difference of Means</b> |
|-----------------------------------------------------------------|-----------------------------|--------------------|----------------------------|
| <b>Induced</b>                                                  |                             |                    |                            |
| heat shock protein 1                                            | Hspb1                       | 155.85             | 169.78                     |
| histocompatibility 2, class II antigen A, beta 1                | H2-Ab1                      | 135.41             | 208.61                     |
| ribonuclease, RNase A family 4                                  | Rnase4                      | 117.69             | 646.19                     |
| histocompatibility 2, class II antigen A, beta 1                | H2-Ab1                      | 106.4              | 475.16                     |
| uncoupling protein 2 (mitochondrial, proton carrier)            | Ucp2                        | 100.18             | 245.58                     |
| RAB26, member RAS oncogene family                               | Rab26                       | 64.17              | 153.5                      |
| FXYD domain-containing ion transport regulator 7                | Fxyd7                       | 52.15              | 335.33                     |
| RIKEN cDNA A730017C20 gene                                      | A730017C20<br>Rik           | 50.87              | 385.84                     |
| RIKEN cDNA C920025E04 gene                                      | C920025E04Rik               | 49.53              | 326.55                     |
| glutathione S-transferase, theta 3                              | Gstt3                       | 47.56              | 205.74                     |
| <b>Supressed</b>                                                |                             |                    |                            |
| ermin, ERM-like protein                                         | Ermn                        | -47.23             | -761.25                    |
| hypothetical protein LOC100047091 /// transmembrane protein 163 | LOC100047091<br>/// Tmem163 | -51.24             | -924.17                    |
| myelin-associated glycoprotein                                  | Mag                         | -57.29             | -3581.1                    |
| gap junction protein, gamma 2                                   | Gjc2                        | -69.07             | -379.46                    |
| sphingosine-1-phosphate receptor 5                              | S1pr5                       | -75.01             | -197.56                    |
| transmembrane protein 125                                       | Tmem125                     | -77.81             | -386.8                     |
| expressed sequence AI314604                                     | AI314604                    | -78.81             | -2677.05                   |
| G protein-coupled receptor 17                                   | Gpr17                       | -80.21             | -4729.8                    |
| myelin-associated oligodendrocytic basic protein                | Mobp                        | -105.64            | -3013.77                   |
| RIKEN cDNA 9630013A20 gene                                      | 9630013A20Rik               | -122.52            | -1083.54                   |
| myelin-associated oligodendrocytic basic protein                | Mobp                        | -124.67            | -2332.93                   |
| myelin-associated oligodendrocytic basic protein                | Mobp                        | -132.05            | -3959.17                   |
| RIKEN cDNA 9630013A20 gene                                      | 9630013A20Rik               | -135.9             | -1530.53                   |
| myelin oligodendrocyte glycoprotein                             | Mog                         | -148.66            | -501.63                    |
| RIKEN cDNA 9630013A20 gene                                      | 9630013A20Rik               | -169.41            | -909                       |

Table S5:  
Significant regulated Genes after **BMP2 6h and 24h**. (Intersection Fig. 3E)  
ESTs and non-annotated Sequences are excluded.

| <b>Regulated Genes BMP2 6h and 24h</b>                               | <b>Symbol</b>             | <b>Fold Change BMP2 6h</b> | <b>Fold Change BMP2 24h</b> |
|----------------------------------------------------------------------|---------------------------|----------------------------|-----------------------------|
| Wnt inhibitory factor 1                                              | Wif1                      | 107.77                     | 273.64                      |
| MAD homolog 6 (Drosophila)                                           | Smad6                     | 26.68                      | 29.71                       |
| gap junction protein, alpha 3                                        | Gja3                      | 26.18                      | 255.35                      |
| noggin                                                               | Nog                       | 25.14                      | 16.22                       |
| myocilin                                                             | Myoc                      | 20.14                      | 23.7                        |
| atonal homolog 8 (Drosophila)                                        | Atoh8                     | 17.18                      | 20.87                       |
| follistatin                                                          | Fst                       | 16.56                      | 19.63                       |
| ADAMTS-like 2                                                        | Adamtsl2                  | 15.45                      | 79.26                       |
| DIRAS family, GTP-binding RAS-like 2                                 | Diras2                    | 12.12                      | 99.94                       |
| kinesin family member 26B                                            | Kif26b                    | 10.6                       | 22.1                        |
| growth arrest and DNA-damage-inducible 45 beta                       | Gadd45b                   | 9.84                       | 14.4                        |
| tumor necrosis factor receptor superfamily, member 12a               | Tnfrsf12a                 | 9.04                       | 10.1                        |
| 3'-phosphoadenosine 5'-phosphosulfate synthase 2                     | Papss2                    | 7.77                       | 16.72                       |
| myosin regulatory light chain interacting protein                    | Mylip                     | 7.66                       | 4.1                         |
| fos-like antigen 2 /// similar to fos-like antigen 2                 | Fosl2 ///<br>LOC634417    | 7.48                       | 6.19                        |
| zinc finger and BTB domain containing 7C                             | Zbtb7c                    | 7.28                       | 6.5                         |
| family with sequence similarity 70, member A                         | Fam70a                    | 7.28                       | 13.35                       |
| serine/threonine kinase 32B                                          | Stk32b                    | 7.26                       | 25.15                       |
| immediate early response 5-like                                      | Ier5l                     | 6.71                       | 5.79                        |
| naked cuticle 1 homolog (Drosophila)                                 | Nkd1                      | 6.35                       | 4.7                         |
| cadherin 22 /// similar to cadherin 22                               | Cdh22 ///<br>LOC100046008 | 6.25                       | 8.83                        |
| serine (or cysteine) peptidase inhibitor, clade F, member 1          | Serpinf1                  | 5.95                       | 83.55                       |
| patched domain containing 2                                          | Ptchd2                    | 5.77                       | 7.31                        |
| transmembrane protein 158                                            | Tmem158                   | 5.68                       | 8.71                        |
| predicted gene 10001                                                 | Gm10001                   | 5.32                       | 32.41                       |
| NUAK family, SNF1-like kinase, 1                                     | Nuak1                     | 5.31                       | 10.81                       |
| regulator of G-protein signaling 2                                   | Rgs2                      | 5.2                        | 5.45                        |
| Src homology 2 domain containing F                                   | Shf                       | 5.07                       | 4.65                        |
| solute carrier family 2 (facilitated glucose transporter), member 13 | Slc2a13                   | 5.05                       | 4.81                        |
| MAD homolog 7 (Drosophila)                                           | Smad7                     | 4.96                       | 6.5                         |
| protein tyrosine phosphatase, receptor type, U                       | Ptpru                     | 4.86                       | 11.55                       |
| glutamate receptor ionotropic, NMDA3A                                | Grin3a                    | 4.85                       | 4.55                        |
| HOP homeobox                                                         | Hopx                      | 4.76                       | 19.68                       |
| mannoside acetylglucosaminyltransferase 4, isoenzyme A               | Mgat4a                    | 4.64                       | 5.47                        |
| potassium voltage gated channel, Shaw-related subfamily, member 4    | Kcnc4                     | 4.59                       | 7.72                        |
| Rhesus blood group-associated C glycoprotein                         | Rhcg                      | 4.37                       | 5.5                         |
| Ly6/Plaur domain containing 1                                        | Lypd1                     | 4.34                       | 6.07                        |
| hairy/enhancer-of-split related with YRPW motif 1                    | Hey1                      | 4.18                       | 3.55                        |
| adenylate cyclase 1                                                  | Adcyl1                    | 4.13                       | 6.33                        |

continue

Table S5 (Part 2)

| <b>Regulated Genes BMP2 6h and 24h</b>                                              | <b>Symbol</b>             | <b>Fold Change BMP2 6h</b> | <b>Fold Change BMP2 24h</b> |
|-------------------------------------------------------------------------------------|---------------------------|----------------------------|-----------------------------|
| cannabinoid receptor 1 (brain)                                                      | Cnr1                      | 3.99                       | 5.56                        |
| collagen, type V, alpha 3                                                           | Col5a3                    | 3.94                       | 8.35                        |
| family with sequence similarity 46, member A                                        | Fam46a                    | 3.84                       | 10.67                       |
| WW, C2 and coiled-coil domain containing 2                                          | Wwc2                      | 3.71                       | 3.67                        |
| potassium channel, subfamily K, member 13                                           | Kcnk13                    | 3.64                       | 7.58                        |
| cartilage acidic protein 1                                                          | Crtac1                    | 3.47                       | 3.56                        |
| BMP and activin membrane-bound inhibitor, homolog (Xenopus laevis)                  | Bambi                     | 3.46                       | 3.6                         |
| vasorin                                                                             | Vasn                      | 3.45                       | 5.06                        |
| CXXC finger 5                                                                       | Cxxc5                     | 3.34                       | 3.76                        |
| transmembrane protein 64                                                            | Tmem64                    | 3.28                       | 2.91                        |
| Rho guanine nucleotide exchange factor (GEF) 4                                      | Arhgef4                   | 3.11                       | 2.54                        |
| inhibitor of DNA binding 1                                                          | Id1                       | 3.08                       | 2.2                         |
| zinc finger protein 423                                                             | Zfp423                    | 3.06                       | 3.61                        |
| olfactomedin 2                                                                      | Olfm2                     | 2.97                       | 5.14                        |
| cut-like homeobox 2                                                                 | Cux2                      | 2.93                       | 4.1                         |
| Ca <sup>2+</sup> -dependent secretion activator                                     | Cadps                     | 2.9                        | 4.96                        |
| nuclear factor of kappa light polypeptide gene enhancer in B-cells inhibitor, alpha | Nfkbia                    | 2.77                       | 2.89                        |
| PDZ domain containing RING finger 3                                                 | Pdzn3                     | 2.74                       | 3.31                        |
| neuropilin 1                                                                        | Nrp1                      | 2.72                       | 2.77                        |
| ninjurin 1                                                                          | Ninj1                     | 2.7                        | 6.31                        |
| ribosomal protein S6 kinase, polypeptide 5                                          | Rps6ka5                   | 2.5                        | 6.24                        |
| family with sequence similarity 129, member B                                       | Fam129b                   | 2.43                       | 3.32                        |
| bone morphogenetic protein receptor, type 1A                                        | Bmpr1a                    | 2.31                       | 2.52                        |
| GH regulated TBC protein 1                                                          | Grtp1                     | -2.31                      | -3.06                       |
| myelocytomatosis oncogene                                                           | Myc                       | -2.37                      | -4.17                       |
| erythrocyte protein band 4,1                                                        | Epb4,1                    | -2.43                      | -3.67                       |
| Ras association (RalGDS/AF-6) domain family member 2                                | Rassf2                    | -2.45                      | -3.26                       |
| carbonyl reductase 3                                                                | Cbr3                      | -2.46                      | -3.28                       |
| leucine rich repeat protein 1, neuronal                                             | Lrrn1                     | -2.52                      | -2.82                       |
| GS homeobox 1                                                                       | Gsx1                      | -2.52                      | -5.17                       |
| EF hand domain containing 2                                                         | Efhd2                     | -2.57                      | -4.53                       |
| carbonic anhydrase 8                                                                | Car8                      | -2.65                      | -6.46                       |
| LIM and senescent cell antigen like domains 2                                       | Lims2                     | -2.8                       | -24.72                      |
| breast carcinoma amplified sequence 1                                               | Bcas1                     | -2.8                       | -24.38                      |
| LIM domain and actin binding 1                                                      | Lima1                     | -2.86                      | -3.5                        |
| glycerol-3-phosphate dehydrogenase 1 (soluble)                                      | Gpd1                      | -2.93                      | -8.02                       |
| methylthioadenosine phosphorylase                                                   | Mtap                      | -3.08                      | -3.27                       |
| inhibin beta-B /// similar to Inhbb protein                                         | Inhbb ///<br>LOC100046802 | -3.1                       | -4.22                       |
| G protein-coupled receptor 17                                                       | Gpr17                     | -3.13                      | -30.9                       |
| SPARC related modular calcium binding 1                                             | Smoc1                     | -3.15                      | -3.95                       |
| phosphatase and actin regulator 3                                                   | Phactr3                   | -3.18                      | -6.73                       |

continue

Table S5 (Part 3)

| <b>Regulated Genes BMP2 6h and 24h</b>                                                       | <b>Symbol</b>            | <b>Fold Change<br/>BMP2 6h</b> | <b>Fold Change<br/>BMP2 24h</b> |
|----------------------------------------------------------------------------------------------|--------------------------|--------------------------------|---------------------------------|
| SH3-domain binding protein 4                                                                 | Sh3bp4                   | -3.26                          | -4.35                           |
| seizure related 6homolog like                                                                | Sez6l                    | -3.3                           | -2.91                           |
| phospholipase C, gamma 2                                                                     | Plcg2                    | -3.39                          | -9.29                           |
| actin filament associated protein 1-like 2                                                   | Afap1l2                  | -3.47                          | -3.68                           |
| TNF receptor associated factor 4                                                             | Traf4                    | -3.54                          | -4.89                           |
| B-cell translocation gene 2, anti-proliferative                                              | Btg2                     | -3.64                          | -3.71                           |
| zinc finger protein 365                                                                      | Zfp365                   | -3.75                          | -5.3                            |
| GS homeobox 2                                                                                | Gsx2                     | -3.85                          | -8.02                           |
| G0/G1 switch gene 2                                                                          | G0s2                     | -3.89                          | -5.35                           |
| similar to manic fringe /// MFNG O-fucosylpeptide 3-<br>beta-N-acetylglucosaminyltransferase | LOC100046464<br>/// Mfng | -3.94                          | -4.47                           |
| neurocalcin delta                                                                            | Ncald                    | -3.94                          | -3.68                           |
| leucine rich repeat and fibronectin type III, extracellular 1                                | Elfn1                    | -4.08                          | -6.57                           |
| delta-like 3 (Drosophila)                                                                    | Dll3                     | -4.14                          | -3.64                           |
| epidermal growth factor receptor                                                             | Egfr                     | -4.15                          | -7.93                           |
| delta-like 1 (Drosophila)                                                                    | Dll1                     | -4.59                          | -4.19                           |
| nuclear factor, erythroid derived 2, like 3                                                  | Nfe2l3                   | -4.66                          | -26.54                          |
| transmembrane protein 51                                                                     | Tmem51                   | -4.83                          | -4.3                            |
| pleckstrin homology domain containing, family F (with<br>FYVE domain) member 1               | Plekhf1                  | -5.88                          | -3.04                           |
| amiloride-sensitive cation channel 2, neuronal                                               | Accn2                    | -6.07                          | -9.61                           |
| bone morphogenetic protein 4                                                                 | Bmp4                     | -9.01                          | -34.17                          |
| protein tyrosine phosphatase, receptor type, E                                               | Ptpre                    | -11.36                         | -11.71                          |
| chondroitin sulfate proteoglycan 4                                                           | Cspg4                    | -14.6                          | -4.05                           |

Table S6:

Significant regulated Genes after **BMP2 6h and TSA 6h**. (Intersection Fig. 3A)  
ESTs and non-annotated Sequences are excluded.

| <b>Regulated Genes BMP2 6h and TSA 6h</b>                               | <b>Symbol</b> | <b>Fold Change<br/>BMP2 6h</b> | <b>Fold Change<br/>TSA 6h</b> |
|-------------------------------------------------------------------------|---------------|--------------------------------|-------------------------------|
| tumor necrosis factor receptor superfamily, member 12a                  | Tnfrsf12a     | 9.04                           | 7.39                          |
| myosin regulatory light chain interacting protein                       | Myliip        | 7.66                           | 3.47                          |
| family with sequence similarity 19, member A2                           | Fam19a2       | 3.13                           | -3.1                          |
| Ca <sup>2+</sup> -dependent secretion activator                         | Cadps         | 2.9                            | -2.52                         |
| serum/glucocorticoid regulated kinase 3                                 | Sgk3          | 2.65                           | -2.54                         |
| Six3 opposite strand transcript 1                                       | Six3os1       | 2.51                           | -4.66                         |
| solute carrier organic anion transporter family, member 1c1             | Slco1c1       | -2.2                           | -2.42                         |
| myelocytomatosis oncogene                                               | Myc           | -2.37                          | -3.82                         |
| solute carrier family 24 (sodium/potassium/calcium exchanger), member 3 | Slc24a3       | -2.44                          | -3.79                         |
| GS homeobox 1                                                           | Gsx1          | -2.52                          | -4.86                         |
| carbonic anhydrase 8                                                    | Car8          | -2.65                          | 2.65                          |
| LIM and senescent cell antigen like domains 2                           | Lims2         | -2.8                           | -4.61                         |
| breast carcinoma amplified sequence 1                                   | Bcas1         | -2.8                           | -9.53                         |
| BTB (POZ) domain containing 17                                          | Btbd17        | -2.82                          | -8.1                          |
| glycerol-3-phosphate dehydrogenase 1 (soluble)                          | Gpd1          | -2.93                          | -2.5                          |
| G protein-coupled receptor 17                                           | Gpr17         | -3.13                          | -6.8                          |
| Down syndrome cell adhesion molecule-like 1                             | Dscam1l       | -3.25                          | -3.19                         |
| seizure related 6homolog like                                           | Sez6l         | -3.3                           | -2.92                         |
| actin filament associated protein 1-like 2                              | Afap1l2       | -3.47                          | -4.84                         |
| G0/G1 switch gene 2                                                     | G0s2          | -3.89                          | -6.74                         |
| leucine rich repeat and fibronectin type III, extracellular 1           | Elfn1         | -4.08                          | -2.81                         |
| delta-like 3 (Drosophila)                                               | Dll3          | -4.14                          | -3.32                         |
| protein tyrosine phosphatase, receptor type, E                          | Ptpre         | -18.37                         | -2.53                         |



Table S7:

Significant regulated Genes after **BMP2 6h and TSA 24h**. (Intersection Fig. 3B)

ESTs and non-annotated Sequences are excluded.

| <b>Regulated Genes BMP2 6h and TSA 24h</b>                              | <b>Symbol</b> | <b>Fold Change BMP2 6h</b> | <b>Fold Change TSA 24h</b> |
|-------------------------------------------------------------------------|---------------|----------------------------|----------------------------|
| connective tissue growth factor                                         | Ctgf          | 32.22                      | 5.94                       |
| follistatin                                                             | Fst           | 16.56                      | 4.18                       |
| DIRAS family, GTP-binding RAS-like 2                                    | Diras2        | 12.12                      | 4.51                       |
| family with sequence similarity 70, member A                            | Fam70a        | 7.28                       | 16.08                      |
| 3'-phosphoadenosine 5'-phosphosulfate synthase 2                        | Papss2        | 6.9                        | -3.34                      |
| MAD homolog 7 (Drosophila)                                              | Smad7         | 4.96                       | -5.03                      |
| ring finger protein 128                                                 | Rnf128        | 4.55                       | 5.47                       |
| BMP and activin membrane-bound inhibitor, homolog (Xenopus laevis)      | Bambi         | 3.46                       | 3.41                       |
| family with sequence similarity 19, member A2                           | Fam19a2       | 3.13                       | -5.38                      |
| calcium channel, voltage-dependent, alpha 2/delta subunit 2             | Cacna2d2      | 2.65                       | 3.81                       |
| lysyl oxidase-like 1                                                    | Loxl1         | 2.39                       | 3.56                       |
| zinc finger, DHHC domain containing 14                                  | Zdhhc14       | -2.25                      | -3.75                      |
| erythrocyte protein band 4,1                                            | Epb4,1        | -2.43                      | -2.55                      |
| solute carrier family 24 (sodium/potassium/calcium exchanger), member 3 | Slc24a3       | -2.44                      | -4.96                      |
| LIM and senescent cell antigen like domains 2                           | Lims2         | -2.8                       | -27.27                     |
| breast carcinoma amplified sequence 1                                   | Bcas1         | -2.8                       | -17.36                     |
| glycerol-3-phosphate dehydrogenase 1 (soluble)                          | Gpd1          | -2.93                      | -7.87                      |
| G protein-coupled receptor 17                                           | Gpr17         | -3.13                      | -80.21                     |
| phosphatase and actin regulator 3                                       | Phactr3       | -3.18                      | -5.81                      |
| Down syndrome cell adhesion molecule-like 1                             | Dscaml1       | -3.25                      | -5.91                      |
| SH3-domain binding protein 4                                            | Sh3bp4        | -3.26                      | -2.79                      |
| actin filament associated protein 1-like 2                              | Afap112       | -3.47                      | -4.16                      |
| TNF receptor associated factor 4                                        | Traf4         | -3.54                      | -2.45                      |
| zinc finger protein 365                                                 | Zfp365        | -3.75                      | -3.23                      |
| G0/G1 switch gene 2                                                     | G0s2          | -3.89                      | -4.02                      |
| delta-like 3 (Drosophila)                                               | Dll3          | -4.14                      | -4.49                      |
| epidermal growth factor receptor                                        | Egfr          | -4.15                      | 2.73                       |
| bone morphogenetic protein 4                                            | Bmp4          | -9.01                      | -15.47                     |
| protein tyrosine phosphatase, receptor type, E                          | Ptpre         | -11.36                     | -5.93                      |

Table S8:

Significant regulated Genes after **BMP2 24h and TSA 6h**. (Intersection Fig. 3C)

ESTs and non-annotated Sequences are excluded.

| <b>Regulated Genes BMP2 24h and TSA 6h</b>                                | <b>Symbol</b> | <b>Fold Change BMP2 24h</b> | <b>Fold Change TSA 6h</b> |
|---------------------------------------------------------------------------|---------------|-----------------------------|---------------------------|
| Kruppel-like factor 4 (gut)                                               | Klf4          | 13.51                       | 7.94                      |
| tubulin, beta 6                                                           | Tubb6         | 12.04                       | 7.41                      |
| tumor necrosis factor receptor superfamily, member 12a                    | Tnfrsf12a     | 10.1                        | 7.39                      |
| Rho GTPase activating protein 29                                          | Arhgap29      | 8.01                        | 5.84                      |
| KDEL (Lys-Asp-Glu-Leu) endoplasmic reticulum protein retention receptor 3 | Kdelr3        | 7.32                        | 11.15                     |
| aquaporin 11                                                              | Aqp11         | 5.08                        | 3.24                      |
| Ca <sup>2+</sup> -dependent secretion activator                           | Cadps         | 4.96                        | -2.52                     |
| zinc finger, CCHC domain containing 12                                    | Zcchc12       | 4.24                        | 8.5                       |
| myosin regulatory light chain interacting protein                         | Myli1         | 4.1                         | 3.47                      |
| growth factor receptor bound protein 14                                   | Grb14         | 3.43                        | 2.87                      |
| regulator of G-protein signalling 10                                      | Rgs10         | 3.25                        | 3.2                       |
| bone morphogenetic protein receptor, type 1A                              | Bmpr1a        | 2.47                        | -2.23                     |
| striatin, calmodulin binding protein                                      | Strn          | -2.35                       | -2.94                     |
| oligodendrocyte myelin glycoprotein                                       | Omg           | -2.61                       | -11.48                    |
| coatamer protein complex, subunit gamma 2, antisense 2                    | Copg2as2      | -2.64                       | 2.41                      |
| WAS/WASL interacting protein family, member 1                             | Wipf1         | -2.68                       | -3.89                     |
| ring finger protein 122                                                   | Rnf122        | -2.76                       | -2.63                     |
| adenosine monophosphate deaminase 3                                       | Ampd3         | -2.77                       | -12.29                    |
| shroom family member 2                                                    | Shroom2       | -2.78                       | -3.69                     |
| zinc fingerprotein 618                                                    | Zfp618        | -2.84                       | -4.19                     |
| seizure related 6homolog like                                             | Sez6l         | -2.91                       | -2.92                     |
| dysbindin (dystrobrevin binding protein 1) domain containing 2            | Dbn1          | -2.92                       | -3.18                     |
| erythrocyte protein band 4,1-like 3                                       | Epb4,1l3      | -3.1                        | -2.41                     |
| CUB and Sushi multiple domains 2                                          | Csmd2         | -3.14                       | -3.08                     |
| proline rich region 18                                                    | Prr18         | -3.19                       | -8.52                     |
| SRY-box containing gene 10                                                | Sox10         | -3.21                       | -3.18                     |
| S100 protein, beta polypeptide, neural                                    | S100b         | -3.21                       | -3.78                     |
| chimerin (chimaerin) 2                                                    | Chn2          | -3.44                       | -5.09                     |
| delta-like 3 (Drosophila)                                                 | Dll3          | -3.64                       | -3.32                     |
| actin filament associated protein 1-like 2                                | Afap1l2       | -3.68                       | -4.84                     |
| family with sequence similarity 13, member C                              | Fam13c        | -4.16                       | -4.83                     |
| myelocytomatosis oncogene                                                 | Myc           | -4.17                       | -3.82                     |
| cytoplasmic FMR1 interacting protein 2                                    | Cyfi2         | -4.22                       | -2.53                     |
| leucine rich repeat transmembrane neuronal 1                              | Lrrtm1        | -4.49                       | -7.54                     |
| protein kinase C, theta                                                   | Prkcq         | -4.7                        | -11.82                    |
| Down syndrome cell adhesion molecule                                      | Dscam         | -4.85                       | -3.7                      |
| G protein-coupled receptor 149                                            | Gpr149        | -4.87                       | -6.66                     |
| platelet derived growth factor, alpha                                     | Pdgfra        | -5.08                       | -4.83                     |
| GS homeobox 1                                                             | Gsx1          | -5.17                       | -4.86                     |
| G0/G1 switch gene 2                                                       | G0s2          | -5.35                       | -6.74                     |

continue

Table S8 (Part 2)

| <b>Regulated Genes BMP2 24h and TSA 6h</b>                             | <b>Symbol</b> | <b>Fold Change<br/>BMP2 24h</b> | <b>Fold Change<br/>TSA 6h</b> |
|------------------------------------------------------------------------|---------------|---------------------------------|-------------------------------|
| EF hand domain containing 1                                            | Efhd1         | -5.45                           | 3.22                          |
| dedicator of cytokinesis 9                                             | Dock9         | -5.59                           | -2.63                         |
| ELOVL family member 7,<br>elongation of long chain fatty acids (yeast) | Elovl7        | -5.71                           | -3.33                         |
| G protein-coupled receptor 37-like 1                                   | Gpr37l1       | -5.74                           | -4.21                         |
| tubulin, beta 4                                                        | Tubb4         | -5.93                           | -4.74                         |
| carbonic anhydrase 8                                                   | Car8          | -6.46                           | 2.65                          |
| leucine rich repeat and fibronectin type III, extracellular 1          | Elfn1         | -6.57                           | -2.81                         |
| plexin B3                                                              | Plxnb3        | -6.81                           | -4.09                         |
| serine/arginine-rich protein specific kinase 3                         | Srpk3         | -7.54                           | -6.01                         |
| Ras association (RalGDS/AF-6) domain family (N-<br>terminal) member 10 | Rassf10       | -7.88                           | -3.37                         |
| glycerol-3-phosphate dehydrogenase 1 (soluble)                         | Gpd1          | -8.02                           | -2.5                          |
| platelet derived growth factor receptor, alpha polypeptide             | Pdgfra        | -8.15                           | -3.93                         |
| galactose-3-O-sulfotransferase 1                                       | Gal3st1       | -8.92                           | -4.96                         |
| RAB33A, member of RAS oncogene family                                  | Rab33a        | -9.41                           | -7.1                          |
| breast carcinoma amplified sequence 1                                  | Bcas1         | -11.02                          | -2.93                         |
| four and a half LIM domains 2                                          | Fhl2          | -11.15                          | -6.79                         |
| predicted gene 98                                                      | Gm98          | -13.78                          | -4.13                         |
| ectonucleotide pyrophosphatase/phosphodiesterase 6                     | Enpp6         | -16.26                          | -2.98                         |
| protein tyrosine phosphatase, receptor type, E                         | Ptpre         | -16.45                          | -2.53                         |
| LIM and senescent cell antigen like domains 2                          | Lims2         | -24.72                          | -4.61                         |
| G protein-coupled receptor 17                                          | Gpr17         | -30.9                           | -6.8                          |

Table S9:

Significant regulated Genes after **BMP2 24h and TSA 24h**. (Intersection Fig. 3D)  
ESTs and non-annotated Sequences are excluded.

| <b>Regulated Genes BMP2 24h and TSA 24h</b>                                            | <b>Symbol</b> | <b>Fold Change BMP2 24h</b> | <b>Fold Change TSA 24h</b> |
|----------------------------------------------------------------------------------------|---------------|-----------------------------|----------------------------|
| DIRAS family, GTP-binding RAS-like 2                                                   | Diras2        | 99.94                       | 4.51                       |
| family with sequence similarity 101, member A                                          | Fam101a       | 36.03                       | 16.73                      |
| follistatin                                                                            | Fst           | 19.63                       | 4.18                       |
| aldehyde dehydrogenase family 1, subfamily A7                                          | Aldh1a7       | 17.98                       | 7.23                       |
| Solute carrier family 26, member 7                                                     | Slc26a7       | 15.08                       | 6.15                       |
| Purkinje cell protein 4                                                                | Pcp4          | 14.04                       | 8.63                       |
| Kruppel-like factor 4 (gut)                                                            | Klf4          | 13.51                       | 4.74                       |
| family with sequence similarity 70, member A                                           | Fam70a        | 13.35                       | 16.08                      |
| 3'-phosphoadenosine 5'-phosphosulfate synthase 2                                       | Papss2        | 10.7                        | -3.34                      |
| selenoprotein M                                                                        | Selm          | 9.08                        | 4.39                       |
| sema domain, immunoglobulin domain (Ig), short basic domain, secreted, (semaphorin) 3C | Sema3c        | 8.52                        | 4.87                       |
| Rho GTPase activating protein 29                                                       | Arhgap29      | 8.01                        | 4.35                       |
| protocadherin 20                                                                       | Pcdh20        | 7.91                        | 17.1                       |
| KDEL (Lys-Asp-Glu-Leu) endoplasmic reticulum protein retention receptor 3              | Kdelr3        | 7.32                        | 6.87                       |
| nephronectin                                                                           | Npnt          | 7.21                        | 5.04                       |
| MAD homolog 7 (Drosophila)                                                             | Smad7         | 6.86                        | -5.69                      |
| expressed sequence AW551984                                                            | AW551984      | 6.77                        | 12.53                      |
| guanylate cyclase 1, soluble, alpha 3                                                  | Gucy1a3       | 6.21                        | 5.18                       |
| phosphodiesterase 8A                                                                   | Pde8a         | 5.36                        | 4.27                       |
| aquaporin 11                                                                           | Aqp11         | 5.08                        | 4.61                       |
| tumor protein D52-like 1                                                               | Tpd52l1       | 4.68                        | 7.97                       |
| calsyntenin 2                                                                          | Clstn2        | 4.68                        | 4.95                       |
| retinoic acid receptor responder (tazarotene induced) 1                                | Rarres1       | 4.45                        | 2.96                       |
| zinc finger, CCHC domain containing 12                                                 | Zcchc12       | 4.24                        | 9.35                       |
| fibronectin 1                                                                          | Fn1           | 4.12                        | 4.78                       |
| eyes absent 4 homolog (Drosophila)                                                     | Eya4          | 4.07                        | 3.09                       |
| interferon induced transmembrane protein 2                                             | Ifitm2        | 3.91                        | 10.33                      |
| a disintegrin and metallopeptidase domain 23                                           | Adam23        | 3.84                        | 3.13                       |
| BMP and activin membrane-bound inhibitor, homolog (Xenopus laevis)                     | Bambi         | 3.6                         | 3.41                       |
| growth arrest specific 6                                                               | Gas6          | 3.49                        | 3.71                       |
| BCL2-associated athanogene 3                                                           | Bag3          | 3.44                        | 3.06                       |
| neuron specific gene family member 2                                                   | Nsg2          | 3.4                         | 2.65                       |
| Eph receptor A5                                                                        | Epha5         | 3.26                        | 2.57                       |
| regulator of G-protein signalling 10                                                   | Rgs10         | 3.25                        | 6.39                       |
| insulin-like growth factor binding protein 3                                           | Igfbp3        | 2.76                        | 3.06                       |
| TBC1 domain family, member 8B                                                          | Tbc1d8b       | 2.43                        | 2.9                        |
| striatin, calmodulin binding protein                                                   | Strn          | -2.35                       | -4.07                      |
| tyrosine kinase, non-receptor, 2                                                       | Tnk2          | -2.37                       | -2.71                      |
| p21 protein (Cdc42/Rac)-activated kinase 3                                             | Pak3          | -2.47                       | -2.69                      |
| oligodendrocyte myelin glycoprotein                                                    | Omg           | -2.61                       | -9.86                      |

continue

Table S9 (Part 2)

| <b>Regulated Genes BMP2 24h and TSA 24h</b>                                        | <b>Symbol</b>          | <b>Fold Change<br/>BMP2 24h</b> | <b>Fold Change<br/>TSA 24h</b> |
|------------------------------------------------------------------------------------|------------------------|---------------------------------|--------------------------------|
| Cnksr family member 3                                                              | Cnksr3                 | -2.62                           | -3.73                          |
| WAS/WASL interacting protein family, member 1                                      | Wipf1                  | -2.68                           | -4.2                           |
| phosphodiesterase 9A                                                               | Pde9a                  | -2.68                           | -2.23                          |
| ring finger protein 122                                                            | Rnf122                 | -2.76                           | -2.92                          |
| pellino 1                                                                          | Peli1                  | -2.77                           | -4.66                          |
| shroom family member 2                                                             | Shroom2                | -2.78                           | -4.46                          |
| dedicator of cytokinesis 10                                                        | Dock10                 | -2.78                           | -2.63                          |
| bridging integrator 1                                                              | Bin1                   | -2.83                           | -3.8                           |
| erythrocyte protein band 4,1-like 3                                                | Epb4,113               | -2.87                           | -3.35                          |
| glycolipid transfer protein                                                        | Gltf                   | -2.88                           | -2.82                          |
| transforming growth factor alpha                                                   | Tgfa                   | -2.89                           | -3.99                          |
| sirtuin 2 (silent mating type information regulation 2, homolog) 2 (S, cerevisiae) | Sirt2                  | -2.97                           | -2.9                           |
| pleckstrin homology-like domain, family B, member 1                                | Phldb1                 | -3.04                           | -3.94                          |
| myelin basic protein                                                               | Mbp                    | -3.11                           | -8.3                           |
| proline rich region 18                                                             | Prr18                  | -3.19                           | -4.58                          |
| SRY-box containing gene 10                                                         | Sox10                  | -3.21                           | -5.31                          |
| S100 protein, beta polypeptide, neural                                             | S100b                  | -3.21                           | -11.6                          |
| cytoplasmic FMR1 interacting protein 2                                             | Cyfp2                  | -3.24                           | -2.66                          |
| chimerin (chimaerin) 2                                                             | Chn2                   | -3.44                           | -7.68                          |
| protein kinase C, zeta                                                             | Prkcz                  | -3.48                           | -6.68                          |
| similar to voltage gated channel like 1 /// sodium leak channel, non-selective     | LOC675405 ///<br>Nalcn | -3.63                           | -8.52                          |
| SH3-domain GRB2-like 3                                                             | Sh3gl3                 | -3.64                           | -7.51                          |
| delta-like 3 (Drosophila)                                                          | Dll3                   | -3.64                           | -4.49                          |
| erythrocyte protein band 4,1                                                       | Epb4,1                 | -3.67                           | -2.55                          |
| actin filament associated protein 1-like 2                                         | Afap112                | -3.68                           | -4.16                          |
| proteolipid protein (myelin) 1                                                     | Plp1                   | -3.72                           | -8.14                          |
| ELOVL family member 7, elongation of long chain fatty acids (yeast)                | Elov17                 | -3.82                           | -6.76                          |
| lysophosphatidylglycerol acyltransferase 1                                         | Lpgat1                 | -3.89                           | -5.79                          |
| dynamamin 3                                                                        | Dnm3                   | -3.9                            | -6.71                          |
| neurofascin                                                                        | Nfasc                  | -3.98                           | -8.21                          |
| dysbindin (dystrobrevin binding protein 1) domain containing 2                     | Dbn11                  | -3.99                           | -2.77                          |
| 2',3'-cyclic nucleotide 3' phosphodiesterase                                       | Cnp                    | -4.05                           | -5.01                          |
| parvin, beta                                                                       | Parvb                  | -4.1                            | -3.1                           |
| ankyrin 3, epithelial                                                              | Ank3                   | -4.22                           | -5.79                          |
| SH3-domain binding protein 4                                                       | Sh3bp4                 | -4.26                           | -3.11                          |
| dedicator of cytokinesis 9                                                         | Dock9                  | -4.3                            | -3.05                          |
| leucine rich repeat transmembrane neuronal 1                                       | Lrrtm1                 | -4.49                           | -5.2                           |
| UDP galactosyltransferase 8A                                                       | Ugt8a                  | -4.53                           | -10.14                         |
| protein kinase C, theta                                                            | Prkce                  | -4.7                            | -12.45                         |
| brain and acute leukemia, cytoplasmic                                              | Baalc                  | -4.71                           | -3.69                          |
| Down syndrome cell adhesion molecule                                               | Dscam                  | -4.85                           | -11.67                         |

continue

Table S9 (Part 3)

| <b>Regulated Genes BMP2 24h and TSA 24h</b>                  | <b>Symbol</b>             | <b>Fold Change BMP2 24h</b> | <b>Fold Change TSA 24h</b> |
|--------------------------------------------------------------|---------------------------|-----------------------------|----------------------------|
| TNF receptor associated factor 4                             | Traf4                     | -4.89                       | -2.45                      |
| sorting nexin family member 30                               | Snx30                     | -5                          | -4.86                      |
| fatty acid 2-hydroxylase                                     | Fa2h                      | -5.13                       | -11.66                     |
| family with sequence similarity 5, member C                  | Fam5c                     | -5.28                       | -4.41                      |
| zinc finger protein 365                                      | Zfp365                    | -5.3                        | -3.23                      |
| G0/G1 switch gene 2                                          | G0s2                      | -5.35                       | -4.02                      |
| EF hand domain containing 1                                  | Efhd1                     | -5.45                       | 6.77                       |
| platelet derived growth factor, alpha                        | Pdgfa                     | -5.57                       | -3.59                      |
| tubulin, beta 4                                              | Tubb4                     | -5.93                       | -12.31                     |
| phosphatase and actin regulator 3                            | Phactr3                   | -6.73                       | -5.81                      |
| plexin B3                                                    | Plxb3                     | -6.81                       | -19.44                     |
| monooxygenase, DBH-like 1                                    | Moxd1                     | -6.85                       | 5.89                       |
| serine/arginine-rich protein specific kinase 3               | Srpk3                     | -7.54                       | -26.6                      |
| protein phosphatase 1, regulatory (inhibitor) subunit 16B    | Ppp1r16b                  | -7.6                        | -10.53                     |
| dual specificity phosphatase-like 15                         | Dusp15                    | -7.73                       | -3.65                      |
| epidermal growth factor receptor                             | Egfr                      | -7.93                       | 2.73                       |
| glycerol-3-phosphate dehydrogenase 1 (soluble)               | Gpd1                      | -8.02                       | -7.87                      |
| inositol 1,4,5-triphosphate receptor 2                       | Itpr2                     | -8.23                       | -4.25                      |
| immunoglobulin-like domain containing receptor 2             | Ildr2                     | -8.28                       | 8.47                       |
| galactose-3-O-sulfotransferase 1                             | Gal3st1                   | -8.92                       | -18.2                      |
| RAB33A, member of RAS oncogene family                        | Rab33a                    | -9.41                       | -13.66                     |
| dipeptidylpeptidase 10 /// similar to Dipeptidylpeptidase 10 | Dpp10 ///<br>LOC100047231 | -10.14                      | -4                         |
| breast carcinoma amplified sequence 1                        | Bcas1                     | -11.02                      | -13.89                     |
| four and a half LIM domains 2                                | Fhl2                      | -11.15                      | -9.48                      |
| protein tyrosine phosphatase, receptor type, E               | Ptpre                     | -11.71                      | -5.93                      |
| cerebellin 2 precursor protein                               | Cbln2                     | -12.09                      | -11.23                     |
| oculocutaneous albinism II                                   | Oca2                      | -14.15                      | -9.37                      |
| ectonucleotide pyrophosphatase/phosphodiesterase 6           | Enpp6                     | -16.26                      | -33.26                     |
| protocadherin 15                                             | Pcdh15                    | -17.37                      | -6.63                      |
| LIM and senescent cell antigen like domains 2                | Lims2                     | -24.72                      | -27.27                     |
| G protein-coupled receptor 17                                | Gpr17                     | -30.9                       | -80.21                     |
| bone morphogenetic protein 4                                 | Bmp4                      | -34.17                      | -15.47                     |

Table S10:

Significant regulated Genes after **TSA 6h and TSA 24h**. (Intersection Fig. 3F)

ESTs and non-annotated Sequences are excluded.

| <b>Regulated Genes TSA 6h and TSA 24h</b>                                                                          | <b>Symbol</b>                           | <b>Fold Change<br/>TSA 6h</b> | <b>Fold Change<br/>TSA 24h</b> |
|--------------------------------------------------------------------------------------------------------------------|-----------------------------------------|-------------------------------|--------------------------------|
| Ras association (RalGDS/AF-6) domain family member 4                                                               | Rassf4                                  | 28.23                         | 17.33                          |
| immediate early response 3                                                                                         | Ier3                                    | 23.54                         | 10.77                          |
| interferon zeta                                                                                                    | Ifnz                                    | 17.79                         | 7.17                           |
| ephrin A3 /// similar to Ephrin A3                                                                                 | Efna3 ///<br>LOC100046031               | 17.24                         | 17.27                          |
| FXYD domain-containing ion transport regulator 7                                                                   | Fxyd7                                   | 17.14                         | 52.15                          |
| transcription factor-like 5 (basic helix-loop-helix)                                                               | Tcf15                                   | 16.43                         | 26.69                          |
| testis expressed gene 15                                                                                           | Tex15                                   | 16.33                         | 19.61                          |
| similar to Tescalcin /// tescalcin                                                                                 | LOC100047138<br>/// Tesc                | 13.81                         | 32.22                          |
| desert hedgehog                                                                                                    | Dhh                                     | 12.84                         | 17.21                          |
| insulin-like 6                                                                                                     | Insl6                                   | 12.82                         | 18.6                           |
| receptor accessory protein 6                                                                                       | Reep6                                   | 12.23                         | 4.92                           |
| heat shock protein 1B                                                                                              | Hspa1b                                  | 12.11                         | 3.3                            |
| nidogen 2                                                                                                          | Nid2                                    | 11.44                         | 5.77                           |
| KDEL (Lys-Asp-Glu-Leu) endoplasmic reticulum protein retention receptor 3                                          | Kdelr3                                  | 11.15                         | 6.87                           |
| thioredoxin interacting protein                                                                                    | Txnip                                   | 8.68                          | 3.75                           |
| zinc finger, CCHC domain containing 12                                                                             | Zcchc12                                 | 8.5                           | 9.35                           |
| Kruppel-like factor 4 (gut)                                                                                        | Klf4                                    | 7.94                          | 4.74                           |
| G protein regulated inducer of neurite outgrowth 2                                                                 | Gprin2                                  | 7.51                          | 6.34                           |
| major facilitator superfamily domain containing 7C                                                                 | Mfsd7c                                  | 7.43                          | 6.84                           |
| ELL associated factor 2                                                                                            | Eaf2                                    | 6.98                          | 9.88                           |
| phorbol-12-myristate-13-acetate-induced protein 1                                                                  | Pmaip1                                  | 6.82                          | 5.9                            |
| rhophilin, Rho GTPase binding protein 2                                                                            | Rhpn2                                   | 6.75                          | 3.71                           |
| somatostatin receptor 2                                                                                            | Sstr2                                   | 6.25                          | 5.43                           |
| biliverdin reductase B (flavin reductase (NADPH))                                                                  | Blvrb                                   | 6.17                          | 6.73                           |
| BH3 interacting domain death agonist                                                                               | Bid                                     | 5.92                          | 3.31                           |
| Rho GTPase activating protein 29                                                                                   | Arhgap29                                | 5.84                          | 4.35                           |
| grancalcin                                                                                                         | Gca                                     | 5.82                          | 4.31                           |
| diacylglycerol kinase kappa                                                                                        | Dgkk                                    | 5.66                          | 16.7                           |
| opioid growth factor receptor-like 1                                                                               | Ogfr1l                                  | 5.59                          | 3.58                           |
| six transmembrane epithelial antigen of the prostate 1                                                             | Steap1                                  | 5.51                          | 7.7                            |
| histocompatibility 2, D region locus 1 ///<br>histocompatibility 2, K1, K region /// similar to H-2K(d)<br>antigen | H2-D1 /// H2-<br>K1 ///<br>LOC100044874 | 5.45                          | 6.67                           |
| fatty acid desaturase 3                                                                                            | Fads3                                   | 5.36                          | 6.04                           |
| WD repeat domain 17                                                                                                | Wdr17                                   | 5.36                          | 3.26                           |
| mitogen-activated protein kinase-activated protein kinase 3                                                        | Mapkapk3                                | 5.32                          | 4.2                            |
| sodium channel, voltage-gated, type III, beta                                                                      | Scn3b                                   | 5                             | 5.57                           |
| major facilitator superfamily domain containing 9                                                                  | Mfsd9                                   | 4.95                          | 4.73                           |
| paraneoplastic antigen MA2                                                                                         | Pnma2                                   | 4.88                          | 5.8                            |
| chromobox homolog 7                                                                                                | Cbx7                                    | 4.73                          | 4.74                           |

continue

Table S10 (Part 2)

| <b>Regulated Genes TSA 6h and TSA 24h</b>                                 | <b>Symbol</b>      | <b>Fold Change<br/>TSA 6h</b> | <b>Fold Change<br/>TSA 24h</b> |
|---------------------------------------------------------------------------|--------------------|-------------------------------|--------------------------------|
| phosphatidylinositol glycan anchor biosynthesis, class F                  | Pigf               | 4.55                          | 2.26                           |
| histocompatibility 2, K1, K region                                        | H2-K1              | 4.53                          | 7.03                           |
| B-cell translocation gene 3 /// B-cell translocation gene 3<br>pseudogene | Btg3 ///<br>Gm7334 | 4.45                          | 3.81                           |
| shroom family member 3                                                    | Shroom3            | 4.32                          | 5.18                           |
| spermatogenesis associated 6                                              | Spata6             | 4.31                          | 3.92                           |
| uveal autoantigen with coiled-coil domains and ankyrin<br>repeats         | Uaca               | 4.29                          | 4.76                           |
| RAB3D, member RAS oncogene family                                         | Rab3d              | 4.23                          | 6.19                           |
| lectin, galactose binding, soluble 1                                      | Lgals1             | 4.21                          | 7.12                           |
| cytochrome c oxidase subunit VIb polypeptide 2                            | Cox6b2             | 4.03                          | 9.24                           |
| dual-specificity tyrosine-(Y)-phosphorylation regulated<br>kinase 3       | Dyrk3              | 3.93                          | 3.75                           |
| cytochrome P450, family 39, subfamily a, polypeptide 1                    | Cyp39a1            | 3.75                          | 6.68                           |
| hepatic leukemia factor                                                   | Hlf                | 3.74                          | 5.58                           |
| solute carrier family 2 (facilitated glucose transporter),<br>member 3    | Slc2a3             | 3.71                          | 3.31                           |
| integral membrane protein 2A                                              | Itm2a              | 3.7                           | 7.38                           |
| cytochrome b5 reductase 1                                                 | Cyb5r1             | 3.68                          | 2.61                           |
| hippocalcin-like 1                                                        | Hpcal1             | 3.61                          | 3.83                           |
| LPS-induced TN factor                                                     | Litaf              | 3.6                           | 3.32                           |
| A kinase (PRKA) anchor protein (gravin) 12                                | Akap12             | 3.58                          | 5.08                           |
| cysteine and glycine-rich protein 2                                       | Csrp2              | 3.56                          | 6.06                           |
| NHL repeat containing 1                                                   | Nhlrc1             | 3.56                          | 2.46                           |
| SH3 domain binding glutamic acid-rich protein like 2                      | Sh3bgrl2           | 3.54                          | 3.12                           |
| serine (or cysteine) peptidase inhibitor, clade I, member 1               | Serpini1           | 3.53                          | 2.52                           |
| CD44 antigen                                                              | Cd44               | 3.49                          | 3.56                           |
| melanoma associated antigen (mutated) 1-like 1                            | Mum111             | 3.49                          | 3.09                           |
| immunoglobulin superfamily, member 9                                      | Igsf9              | 3.48                          | 3.71                           |
| histocompatibility 2, D region locus 1                                    | H2-D1              | 3.44                          | 6.16                           |
| tumor necrosis factor, alpha-induced protein 8                            | Tnfaip8            | 3.43                          | 5.17                           |
| cellular repressor of E1A-stimulated genes 1                              | Creg1              | 3.42                          | 2.34                           |
| ATP-binding cassette, sub-family A (ABC1), member 5                       | Abca5              | 3.38                          | 2.83                           |
| ARP3 actin-related protein 3 homolog B (yeast)                            | Actr3b             | 3.32                          | 3.23                           |
| thymus cell antigen 1, theta                                              | Thy1               | 3.3                           | 9.99                           |
| lactamase, beta 2                                                         | Lactb2             | 3.27                          | 2.89                           |
| aquaporin 11                                                              | Aqp11              | 3.24                          | 4.61                           |
| EF hand domain containing 1                                               | Efhd1              | 3.22                          | 6.77                           |
| small nucleolar RNA, C/D box 123                                          | Snord123           | 3.22                          | 10.37                          |
| regulator of G-protein signalling 10                                      | Rgs10              | 3.2                           | 6.39                           |
| fucosyltransferase 10                                                     | Fut10              | 3.16                          | 2.38                           |
| solute carrier family 29 (nucleoside transporters),<br>member 1           | Slc29a1            | 3.15                          | 3.79                           |
| ribosomal protein S6 kinase polypeptide 1                                 | Rps6ka1            | 3.14                          | 2.37                           |

continue



Table S10 (Part 3)

| <b>Regulated Genes TSA 6h and TSA 24h</b>                       | <b>Symbol</b>             | <b>Fold Change<br/>TSA 6h</b> | <b>Fold Change<br/>TSA 24h</b> |
|-----------------------------------------------------------------|---------------------------|-------------------------------|--------------------------------|
| phosphatidylinositol transfer protein, membrane-associated 1    | Pitpnm1                   | 3.14                          | 3.5                            |
| PDZ and LIM domain 7                                            | Pdlim7                    | 3.11                          | 2.48                           |
| sarcalumenin                                                    | Srl                       | 3.11                          | 2.48                           |
| anterior pharynx defective 1b homolog (C, elegans) ///          | Aph1b ///                 | 3.03                          | 3.12                           |
| anterior pharynx defective 1c homolog (C, elegans)              | Aph1c                     |                               |                                |
| transmembrane protein 218                                       | Tmem218                   | 2.99                          | 3.07                           |
| histocompatibility 2, D region                                  | H2-L                      | 2.95                          | 5.24                           |
| scavenger receptor class B, member 1                            | Scarb1                    | 2.93                          | 2.39                           |
| Tmsb15b1-Tmsb15b2 readthrough transcript /// thymosin beta 15b2 | Tmsb15b1-<br>Tmsb15b2 /// | 2.91                          | 3.41                           |
| X-linked myotubular myopathy gene 1                             | Mtm1                      | 2.89                          | 2.65                           |
| PRKC, apoptosis, WT1, regulator                                 | Pawr                      | 2.89                          | 2.71                           |
| cDNA sequence X99384                                            | X99384                    | 2.88                          | 4.05                           |
| pituitary tumor-transforming gene 1                             | Pttg1                     | 2.87                          | 2.37                           |
| microsomal glutathione S-transferase 3                          | Mgst3                     | 2.87                          | 3.67                           |
| zinc finger protein 217                                         | Zfp217                    | 2.83                          | 2.65                           |
| sorbitol dehydrogenase                                          | Sord                      | 2.78                          | 4.11                           |
| G protein-coupled receptor associated sorting protein 2         | Gprasp2                   | 2.78                          | 2.41                           |
| transmembrane protein 41a                                       | Tmem41a                   | 2.68                          | 2.94                           |
| EGL nine homolog 3 (C, elegans)                                 | Egln3                     | 2.64                          | 3.5                            |
| cysteine conjugate-beta lyase 2                                 | Ccbl2                     | 2.64                          | 3.26                           |
| vesicle amine transport protein 1 homolog-like (T, californica) | Vat11                     | 2.64                          | 2.67                           |
| synaptonemal complex central element protein 2                  | Syce2                     | 2.55                          | 3.62                           |
| calcium binding atopy-related autoantigen 1                     | Cbara1                    | 2.49                          | 2.58                           |
| prolylcarboxypeptidase (angiotensinase C)                       | Prpc                      | 2.45                          | 4.56                           |
| unc-13 homolog B (C, elegans)                                   | Unc13b                    | 2.37                          | 3.12                           |
| frizzled homolog 7 (Drosophila)                                 | Fzd7                      | 2.36                          | 3                              |
| SEH1-like (S, cerevisiae)                                       | Seh11                     | -2.18                         | -2.37                          |
| scrapie responsive gene 1                                       | Scrg1                     | -2.21                         | -2.94                          |
| poly(rC) binding protein 4                                      | Pcbp4                     | -2.34                         | -2.51                          |
| cytohesin 2                                                     | Cyth2                     | -2.34                         | -2.68                          |
| BR serine/threonine kinase 1                                    | Brsk1                     | -2.34                         | -3.09                          |
| ubiquitin-fold modifier conjugating enzyme 1                    | Ufc1                      | -2.35                         | -3.35                          |
| Kv channel interacting protein 3, calsenilin                    | Kcnip3                    | -2.4                          | -2.81                          |
| proviral integration site 3                                     | Pim3                      | -2.41                         | -5.92                          |
| glycerol-3-phosphate dehydrogenase 1 (soluble)                  | Gpd1                      | -2.5                          | -7.87                          |
| KN motif and ankyrin repeat domains 1                           | Kank1                     | -2.51                         | -3.29                          |
| protein tyrosine phosphatase, receptor type, E                  | Ptpre                     | -2.53                         | -7.19                          |
| cytoplasmic FMR1 interacting protein 2                          | Cyfi2                     | -2.53                         | -3.79                          |
| kelch-like 2, Mayven (Drosophila)                               | Klhl2                     | -2.56                         | -4.08                          |
| dedicator of cytokinesis 9                                      | Dock9                     | -2.63                         | -3.28                          |
| ring finger protein 122                                         | Rnf122                    | -2.63                         | -2.92                          |

continue

Table S10 (Part 4)

| <b>Regulated Genes TSA 6h and TSA 24h</b>                                                       | <b>Symbol</b> | <b>Fold Change<br/>TSA 6h</b> | <b>Fold Change<br/>TSA 24h</b> |
|-------------------------------------------------------------------------------------------------|---------------|-------------------------------|--------------------------------|
| B-cell CLL/lymphoma 7A                                                                          | Bcl7a         | -2.64                         | -2.85                          |
| chromodomain helicase DNA binding protein 3                                                     | Chd3          | -2.8                          | -4.41                          |
| SRY-box containing gene 10                                                                      | Sox10         | -2.81                         | -13.51                         |
| LAG1 homolog, ceramide synthase 2                                                               | Lass2         | -2.82                         | -2.77                          |
| lysophosphatidylglycerol acyltransferase 1                                                      | Lpgat1        | -2.87                         | -6.43                          |
| poly (ADP-ribose) polymerase family, member 8                                                   | Parp8         | -2.88                         | -2.76                          |
| transmembrane and coiled-coil domains 2                                                         | Tmcc2         | -2.9                          | -5.09                          |
| BR serine/threonine kinase 2                                                                    | Brsk2         | -2.9                          | -2.47                          |
| Rho guanine nucleotide exchange factor (GEF7)                                                   | Arhgef7       | -2.91                         | -5.52                          |
| myeloid/lymphoid or mixed-lineage leukemia (trithorax homolog, Drosophila); translocated to, 11 | Mllt11        | -2.92                         | -5.38                          |
| NAC alpha domain containing                                                                     | Nacad         | -2.92                         | -2.81                          |
| striatin, calmodulin binding protein                                                            | Strn          | -2.93                         | -4.04                          |
| breast carcinoma amplified sequence 1                                                           | Bcas1         | -2.93                         | -13.89                         |
| RUN and SH3 domain containing 2                                                                 | Rusc2         | -2.94                         | -4.28                          |
| ectonucleotide pyrophosphatase/phosphodiesterase 6                                              | Enpp6         | -2.98                         | -33.26                         |
| Down syndrome cell adhesion molecule                                                            | Dscam         | -2.98                         | -4.57                          |
| S100 calcium binding protein A16                                                                | S100a16       | -2.99                         | -2.69                          |
| family with sequence similarity 19, member A2                                                   | Fam19a2       | -3.1                          | -5.38                          |
| discs, large (Drosophila) homolog-associated protein 1                                          | Dlgap1        | -3.19                         | -2.42                          |
| Down syndrome cell adhesion molecule-like 1                                                     | Dscaml1       | -3.19                         | -5.91                          |
| nibrin                                                                                          | Nbn           | -3.25                         | -2.75                          |
| low density lipoprotein receptor                                                                | Ldlr          | -3.31                         | -13.49                         |
| TAF9B RNA polymerase II, TATA box binding protein (TBP)-associated factor                       | Taf9b         | -3.31                         | -2.63                          |
| delta-like 3 (Drosophila)                                                                       | Dll3          | -3.32                         | -4.49                          |
| ankyrin 3, epithelial                                                                           | Ank3          | -3.32                         | -3.88                          |
| ELOVL family member 7, elongation of long chain fatty acids (yeast)                             | Elovl7        | -3.33                         | -14.34                         |
| kit oncogene                                                                                    | Kit           | -3.39                         | -8.77                          |
| doublecortin                                                                                    | Dcx           | -3.45                         | -10.12                         |
| phosphodiesterase 4B, cAMP specific                                                             | Pde4b         | -3.48                         | -3.39                          |
| S100 protein, beta polypeptide, neural                                                          | S100b         | -3.54                         | -14.71                         |
| WAS/WASL interacting protein family, member 1                                                   | Wipfl         | -3.64                         | -4.68                          |
| collagen, type IX, alpha 1                                                                      | Col9a1        | -3.69                         | -6.2                           |
| shroom family member 2                                                                          | Shroom2       | -3.69                         | -4.46                          |
| phosphatidic acid phosphatase type 2 domain containing 1B                                       | Ppapdc1b      | -3.74                         | -3.85                          |
| solute carrier family 24 (sodium/potassium/calcium exchanger), member 3                         | Slc24a3       | -3.79                         | -4.96                          |
| mex3 homolog B (C, elegans)                                                                     | Mex3b         | -3.79                         | -2.77                          |
| uronyl-2-sulfotransferase                                                                       | Ust           | -3.79                         | -4.11                          |
| retinaldehyde binding protein 1                                                                 | Rlbp1         | -3.81                         | -3.14                          |
| hydroxy-delta-5-steroid dehydrogenase, 3 beta- and steroid delta-isomerase 7                    | Hsd3b7        | -3.95                         | -6.8                           |

continue

Table S10 (Part 5)

| <b>Regulated Genes TSA 6h and TSA 24h</b>                                                | <b>Symbol</b>        | <b>Fold Change<br/>TSA 6h</b> | <b>Fold Change<br/>TSA 24h</b> |
|------------------------------------------------------------------------------------------|----------------------|-------------------------------|--------------------------------|
| plexin B3                                                                                | Plxnb3               | -4.09                         | -19.44                         |
| predicted gene 98                                                                        | Gm98                 | -4.13                         | -20.43                         |
| beaded filament structural protein 2, phakinin                                           | Bfsp2                | -4.14                         | -6.58                          |
| minichromosome maintenance deficient 3 (S, cerevisiae)<br>associated protein             | Mcm3ap               | -4.24                         | -2.63                          |
| predicted gene 13111                                                                     | Gm13111              | -4.3                          | -3.66                          |
| ligand dependent nuclear receptor corepressor-like                                       | Lcorl                | -4.32                         | -12.53                         |
| versican                                                                                 | Vcan                 | -4.37                         | -4.57                          |
| MAP6 domain containing 1                                                                 | Map6d1               | -4.51                         | -17.39                         |
| regulator of chromosome condensation (RCC1) and BTB<br>(POZ) domain containing protein 2 | Rcbtb2               | -4.52                         | -3.94                          |
| platelet derived growth factor, alpha                                                    | Pdgfa                | -4.54                         | -3.59                          |
| adaptor-related protein complex AP-4, sigma 1                                            | Ap4s1                | -4.6                          | -3.48                          |
| LIM and senescent cell antigen like domains 2                                            | Lims2                | -4.61                         | -27.27                         |
| leucine rich repeat containing 4                                                         | Lrrc4                | -4.72                         | -2.47                          |
| tubulin, beta 4                                                                          | Tubb4                | -4.74                         | -12.31                         |
| actin filament associated protein 1-like 2                                               | Afap112              | -4.84                         | -4.16                          |
| H2A histone family, member Y2 /// H2A histone family,<br>member Y3                       | H2afy2 ///<br>H2afy3 | -4.88                         | -3.89                          |
| family with sequence similarity 176, member A                                            | Fam176a              | -4.89                         | -3.96                          |
| galactose-3-O-sulfotransferase 1                                                         | Gal3st1              | -4.96                         | -18.2                          |
| chimerin (chimaerin) 2                                                                   | Chn2                 | -5.09                         | -7.68                          |
| tumor suppressor candidate 1                                                             | Tusc1                | -5.46                         | -2.79                          |
| zinc finger E-box binding homeobox 2                                                     | Zeb2                 | -5.52                         | -3.15                          |
| serine/arginine-rich protein specific kinase 3                                           | Srpk3                | -6.01                         | -26.6                          |
| G protein-coupled receptor 149                                                           | Gpr149               | -6.26                         | -18.02                         |
| RNA binding motif protein, X chromosome                                                  | Rbmx                 | -6.29                         | -3.7                           |
| DMRT-like family B with proline-rich C-terminal, 1                                       | Dmrtb1               | -6.29                         | -5.7                           |
| suppression of tumorigenicity 18                                                         | St18                 | -6.44                         | -30.35                         |
| potassium channel tetramerisation domain containing 4                                    | Kctd4                | -6.66                         | -14.35                         |
| G0/G1 switch gene 2                                                                      | G0s2                 | -6.74                         | -4.02                          |
| proline rich region 18                                                                   | Prr18                | -6.74                         | -4.09                          |
| four and a half LIM domains 2                                                            | Fhl2                 | -6.79                         | -9.48                          |
| G protein-coupled receptor 17                                                            | Gpr17                | -6.8                          | -80.21                         |
| RAB33A, member of RAS oncogene family                                                    | Rab33a               | -7.1                          | -13.66                         |
| leucine rich repeat transmembrane neuronal 1                                             | Lrrtm1               | -7.54                         | -5.2                           |
| suppressor of variegation 4-20 homolog 1 (Drosophila)                                    | Suv420h1             | -8.05                         | -3.29                          |
| apoptosis, caspase activation inhibitor                                                  | Aven                 | -8.33                         | -4.14                          |
| apoptosis-associated tyrosine kinase                                                     | Aatk                 | -9.6                          | -17.1                          |
| NK2 transcription factor related, locus 2 (Drosophila)                                   | Nkx2-2               | -11.28                        | -17.97                         |
| oligodendrocyte myelin glycoprotein                                                      | Omg                  | -11.48                        | -9.86                          |
| protein kinase C, theta                                                                  | Prkcq                | -11.82                        | -12.45                         |
| H2A histone family, member Y2                                                            | H2afy2               | -14.59                        | -6.17                          |

Table S11:

GO Terms obtained from the of hierarchical Cluster Analysis (Fig. 3G, Genes 1-200) for the Sub-cluster:

**TSA up-regulated 6h**

| GO Term                       | Count | p-Value  |
|-------------------------------|-------|----------|
| GO:0031090~organelle membrane | 15    | 1.08E-03 |

Table S12:

GO Terms obtained from the of hierarchical Cluster Analysis (Fig. 3G, Genes 201-428) for the Sub-cluster:

**TSA up-regulated 6h & 24h**

| GO Term              | Count | p-Value  |
|----------------------|-------|----------|
| GO:0044464~cell part | 145   | 2.01E-04 |
| GO:0005623~cell      | 145   | 2.01E-04 |

Table S13:

GO Terms obtained from the of hierarchical Cluster Analysis (Fig. 3G, Genes 428-789) for the Sub-cluster:

**TSA up-regulated 24h**

| GO Term                                                                           | Count | p-Value  |
|-----------------------------------------------------------------------------------|-------|----------|
| GO:0042611~MHC protein complex                                                    | 10    | 4.52E-08 |
| GO:0048002~antigen processing and presentation of peptide antigen                 | 8     | 1.81E-06 |
| GO:0019882~antigen processing and presentation                                    | 10    | 4.04E-06 |
| GO:0042612~MHC class I protein complex                                            | 7     | 1.69E-05 |
| GO:0008289~lipid binding                                                          | 19    | 1.23E-04 |
| GO:0048503~GPI anchor binding                                                     | 10    | 1.26E-04 |
| GO:0002474~antigen processing and presentation of peptide antigen via MHC class I | 5     | 2.65E-04 |
| GO:0005543~phospholipid binding                                                   | 13    | 3.74E-04 |
| GO:0050896~response to stimulus                                                   | 48    | 4.52E-04 |
| GO:0004364~glutathione transferase activity                                       | 5     | 4.81E-04 |
| GO:0044444~cytoplasmic part                                                       | 80    | 5.12E-04 |
| GO:0005507~copper ion binding                                                     | 7     | 7.13E-04 |
| GO:0005576~extracellular region                                                   | 61    | 9.70E-04 |
| GO:0005886~plasma membrane                                                        | 48    | 1.06E-03 |

Table S14:

GO Terms obtained from the of hierarchical Cluster Analysis (Fig. 3G, genes 1-789) for the Sub-cluster:

**TSA up-regulated**

| GO Term                                                           | Count | p-Value  |
|-------------------------------------------------------------------|-------|----------|
| GO:0042611~MHC protein complex                                    | 10    | 1.86E-05 |
| GO:0004364~glutathione transferase activity                       | 7     | 9.99E-05 |
| GO:0048002~antigen processing and presentation of peptide antigen | 8     | 2.48E-04 |
| GO:0005737~cytoplasm                                              | 237   | 3.01E-04 |
| GO:0044444~cytoplasmic part                                       | 150   | 3.67E-04 |
| GO:0048503~GPI anchor binding                                     | 13    | 7.11E-04 |
| GO:0048037~cofactor binding                                       | 17    | 7.65E-04 |
| GO:0042612~MHC class I protein complex                            | 7     | 8.86E-04 |

Table S15:

GO Terms obtained from the of hierarchical Cluster Analysis (Fig. 3G, genes 1799-2074) for the Sub-cluster:

**TSA down-regulated**

| <b>GO Term</b>                                                                                 | <b>Count</b> | <b>p-Value</b> |
|------------------------------------------------------------------------------------------------|--------------|----------------|
| GO:0006323~DNA packaging                                                                       | 20           | 7.18E-10       |
| GO:0006325~establishment and/or maintenance of chromatin architecture                          | 19           | 3.15E-09       |
| GO:0016569~covalent chromatin modification                                                     | 10           | 1.10E-08       |
| GO:0016568~chromatin modification                                                              | 16           | 1.24E-08       |
| GO:0043283~biopolymer metabolic process                                                        | 94           | 1.31E-08       |
| GO:0044427~chromosomal part                                                                    | 19           | 3.62E-08       |
| GO:0005694~chromosome                                                                          | 20           | 5.70E-08       |
| GO:0051276~chromosome organization and biogenesis                                              | 19           | 2.06E-07       |
| GO:0005634~nucleus                                                                             | 83           | 2.47E-06       |
| GO:0016573~histone acetylation                                                                 | 5            | 8.39E-06       |
| GO:0000785~chromatin                                                                           | 12           | 1.04E-05       |
| GO:0003676~nucleic acid binding                                                                | 68           | 1.18E-05       |
| GO:0006259~DNA metabolic process                                                               | 23           | 1.89E-05       |
| GO:0016570~histone modification                                                                | 7            | 2.33E-05       |
| GO:0065004~protein-DNA complex assembly                                                        | 9            | 2.49E-05       |
| GO:0008134~transcription factor binding                                                        | 14           | 2.94E-05       |
| GO:0031497~chromatin assembly                                                                  | 8            | 3.60E-05       |
| GO:0050794~regulation of cellular process                                                      | 73           | 3.62E-05       |
| GO:0016070~RNA metabolic process                                                               | 56           | 3.80E-05       |
| GO:0006473~protein amino acid acetylation                                                      | 5            | 4.40E-05       |
| GO:0031981~nuclear lumen                                                                       | 25           | 5.02E-05       |
| GO:0006333~chromatin assembly or disassembly                                                   | 9            | 6.05E-05       |
| GO:0005654~nucleoplasm                                                                         | 22           | 6.65E-05       |
| GO:0044428~nuclear part                                                                        | 31           | 7.49E-05       |
| GO:0043170~macromolecule metabolic process                                                     | 102          | 8.40E-05       |
| GO:0044451~nucleoplasm part                                                                    | 21           | 8.42E-05       |
| GO:0006139~nucleobase, nucleoside, nucleotide and nucleic acid metabolic process               | 66           | 8.44E-05       |
| GO:0019219~regulation of nucleobase, nucleoside, nucleotide and nucleic acid metabolic process | 50           | 8.57E-05       |
| GO:0006334~nucleosome assembly                                                                 | 7            | 9.12E-05       |
| GO:0006355~regulation of transcription, DNA-dependent                                          | 47           | 1.42E-04       |
| GO:0050789~regulation of biological process                                                    | 76           | 1.64E-04       |
| GO:0006351~transcription, DNA-dependent                                                        | 47           | 1.89E-04       |
| GO:0032774~RNA biosynthetic process                                                            | 47           | 1.98E-04       |
| GO:0043234~protein complex                                                                     | 41           | 2.09E-04       |
| GO:0045449~regulation of transcription                                                         | 48           | 2.24E-04       |
| GO:0006350~transcription                                                                       | 49           | 2.53E-04       |
| GO:0010468~regulation of gene expression                                                       | 50           | 2.77E-04       |
| GO:0031974~membrane-enclosed lumen                                                             | 25           | 3.20E-04       |
| GO:0043233~organelle lumen                                                                     | 25           | 3.20E-04       |
| GO:0043543~protein amino acid acylation                                                        | 5            | 3.27E-04       |
| GO:0043687~post-translational protein modification                                             | 34           | 3.57E-04       |

continue

Table S15 (Part 2)

| GO Term                                                                         | Count | p-Value  |
|---------------------------------------------------------------------------------|-------|----------|
| GO:0031323~regulation of cellular metabolic process                             | 51    | 3.83E-04 |
| GO:0005515~protein binding                                                      | 100   | 4.73E-04 |
| GO:0006464~protein modification process                                         | 37    | 5.16E-04 |
| GO:0043412~biopolymer modification                                              | 38    | 5.28E-04 |
| GO:0065003~macromolecular complex assembly                                      | 14    | 6.03E-04 |
| GO:0000122~negative regulation of transcription from RNA polymerase II promoter | 9     | 7.80E-04 |
| GO:0022607~cellular component assembly                                          | 15    | 8.59E-04 |
| GO:0032991~macromolecular complex                                               | 45    | 9.58E-04 |
| GO:0019222~regulation of metabolic process                                      | 51    | 1.00E-03 |

Table S16:

GO Terms obtained from the of hierarchical Cluster Analysis (Fig. 3G, genes 790-878) for the Sub-cluster:

**TSA & BMP2 up-regulated**

| GO Term                                                                     | Count | p-Value  |
|-----------------------------------------------------------------------------|-------|----------|
| GO:0007167~enzyme linked receptor protein signaling pathway                 | 10    | 2.63E-05 |
| GO:0005539~glycosaminoglycan binding                                        | 6     | 7.79E-05 |
| GO:0030247~polysaccharide binding                                           | 6     | 1.17E-04 |
| GO:0007155~cell adhesion                                                    | 13    | 1.54E-04 |
| GO:0022610~biological adhesion                                              | 13    | 1.54E-04 |
| GO:0001871~pattern binding                                                  | 6     | 1.62E-04 |
| GO:0008201~heparin binding                                                  | 5     | 3.81E-04 |
| GO:0007169~transmembrane receptor protein tyrosine kinase signaling pathway | 7     | 4.93E-04 |
| GO:0005578~proteinaceous extracellular matrix                               | 8     | 6.20E-04 |
| GO:0031012~extracellular matrix                                             | 8     | 7.00E-04 |
| GO:0007160~cell-matrix adhesion                                             | 5     | 7.76E-04 |
| GO:0031589~cell-substrate adhesion                                          | 5     | 9.33E-04 |

Table S17:

GO Terms obtained from the of hierarchical Cluster Analysis (Fig. 3G, genes 1283-1798) for the Sub-cluster:

**TSA & BMP2 down-regulated**

| GO Term                                         | Count | p-Value  |
|-------------------------------------------------|-------|----------|
| GO:0007399~nervous system development           | 46    | 1.42E-12 |
| GO:0032502~developmental process                | 106   | 8.22E-10 |
| GO:0048468~cell development                     | 56    | 2.81E-08 |
| GO:0048856~anatomical structure development     | 78    | 3.53E-08 |
| GO:0022008~neurogenesis                         | 27    | 6.14E-08 |
| GO:0008092~cytoskeletal protein binding         | 28    | 6.43E-08 |
| GO:0048731~system development                   | 69    | 8.25E-08 |
| GO:0030154~cell differentiation                 | 71    | 1.40E-07 |
| GO:0048869~cellular developmental process       | 71    | 1.40E-07 |
| GO:0007275~multicellular organismal development | 80    | 3.94E-07 |
| GO:0043209~myelin sheath                        | 5     | 9.74E-07 |
| GO:0032501~multicellular organismal process     | 94    | 1.64E-06 |

continue

Table S17 (Part 2)

| <b>GO Term</b>                                                | <b>Count</b> | <b>p-Value</b> |
|---------------------------------------------------------------|--------------|----------------|
| GO:0001508~regulation of action potential                     | 9            | 2.79E-06       |
| GO:0007272~ensheathment of neurons                            | 8            | 4.02E-06       |
| GO:0008366~axon ensheathment                                  | 8            | 4.02E-06       |
| GO:0005515~protein binding                                    | 159          | 5.17E-06       |
| GO:0048699~generation of neurons                              | 22           | 9.79E-06       |
| GO:0030182~neuron differentiation                             | 20           | 1.89E-05       |
| GO:0003779~actin binding                                      | 19           | 2.18E-05       |
| GO:0005856~cytoskeleton                                       | 39           | 2.50E-05       |
| GO:0042552~myelination                                        | 7            | 3.52E-05       |
| GO:0050877~neurological system process                        | 27           | 5.73E-05       |
| GO:0007154~cell communication                                 | 87           | 6.01E-05       |
| GO:0019226~transmission of nerve impulse                      | 17           | 9.22E-05       |
| GO:0007267~cell-cell signaling                                | 21           | 9.26E-05       |
| GO:0000902~cell morphogenesis                                 | 26           | 9.54E-05       |
| GO:0032989~cellular structure morphogenesis                   | 26           | 9.54E-05       |
| GO:0030323~respiratory tube development                       | 9            | 1.03E-04       |
| GO:0007409~axonogenesis                                       | 13           | 1.92E-04       |
| GO:0007010~cytoskeleton organization and biogenesis           | 24           | 2.68E-04       |
| GO:0016020~membrane                                           | 156          | 2.88E-04       |
| GO:0009987~cellular process                                   | 236          | 3.68E-04       |
| GO:0048812~neurite morphogenesis                              | 13           | 3.82E-04       |
| GO:0048667~neuron morphogenesis during differentiation        | 13           | 3.82E-04       |
| GO:0030030~cell projection organization and biogenesis        | 17           | 4.09E-04       |
| GO:0048858~cell projection morphogenesis                      | 17           | 4.09E-04       |
| GO:0032990~cell part morphogenesis                            | 17           | 4.09E-04       |
| GO:0031175~neurite development                                | 14           | 4.88E-04       |
| GO:0030324~lung development                                   | 8            | 5.88E-04       |
| GO:0017048~Rho GTPase binding                                 | 5            | 9.20E-04       |
| GO:0005623~cell                                               | 276          | 9.31E-04       |
| GO:0044464~cell part                                          | 276          | 9.31E-04       |
| GO:0045843~negative regulation of striated muscle development | 4            | 9.42E-04       |
| GO:0005886~plasma membrane                                    | 56           | 9.56E-04       |
| GO:0006915~apoptosis                                          | 28           | 1.05E-03       |

Table S18:

GO Terms obtained from the of hierarchical Cluster Analysis (Fig. 3G, genes 959-1090) for the Sub-cluster:

**BMP2 up-regulated 6h & 24h**

| <b>GO Term</b>                                                                      | <b>Count</b> | <b>p-Value</b> |
|-------------------------------------------------------------------------------------|--------------|----------------|
| GO:0007167~enzyme linked receptor protein signaling pathway                         | 15           | 2.47E-09       |
| GO:0007178~transmembrane receptor protein serine/threonine kinase signaling pathway | 8            | 8.23E-07       |
| GO:0007154~cell communication                                                       | 36           | 2.68E-06       |
| GO:0007166~cell surface receptor linked signal transduction                         | 23           | 5.40E-06       |
| GO:0007165~signal transduction                                                      | 33           | 9.44E-06       |
| GO:0007275~multicellular organismal development                                     | 30           | 1.28E-05       |
| GO:0048856~anatomical structure development                                         | 28           | 2.05E-05       |
| GO:0048731~system development                                                       | 25           | 3.76E-05       |
| GO:0030509~BMP signaling pathway                                                    | 5            | 4.06E-05       |
| GO:0032502~developmental process                                                    | 34           | 5.98E-05       |
| GO:0030154~cell differentiation                                                     | 25           | 9.26E-05       |
| GO:0048869~cellular developmental process                                           | 25           | 9.26E-05       |
| GO:0032501~multicellular organismal process                                         | 31           | 6.00E-04       |

Table S19:

GO Terms obtained from the of hierarchical Cluster Analysis (Fig. 3G, genes 1091-1282) for the Sub-cluster:

**BMP2 up-regulated 24h**

| <b>GO Term</b>                                              | <b>Count</b> | <b>p-Value</b> |
|-------------------------------------------------------------|--------------|----------------|
| GO:0007275~multicellular organismal development             | 39           | 2.23E-06       |
| GO:0032502~developmental process                            | 44           | 2.26E-05       |
| GO:0032501~multicellular organismal process                 | 42           | 7.00E-05       |
| GO:0009887~organ morphogenesis                              | 15           | 1.17E-04       |
| GO:0048514~blood vessel morphogenesis                       | 9            | 2.56E-04       |
| GO:0048468~cell development                                 | 23           | 3.02E-04       |
| GO:0048513~organ development                                | 25           | 3.13E-04       |
| GO:0009653~anatomical structure morphogenesis               | 22           | 4.63E-04       |
| GO:0030154~cell differentiation                             | 29           | 5.42E-04       |
| GO:0048869~cellular developmental process                   | 29           | 5.42E-04       |
| GO:0007154~cell communication                               | 39           | 5.46E-04       |
| GO:0001568~blood vessel development                         | 9            | 6.92E-04       |
| GO:0001944~vasculature development                          | 9            | 7.51E-04       |
| GO:0007166~cell surface receptor linked signal transduction | 23           | 8.80E-04       |
| GO:0007507~heart development                                | 8            | 8.83E-04       |
| GO:0016477~cell migration                                   | 10           | 8.94E-04       |



Table S20:

GO Terms obtained from the of hierarchical Cluster Analysis (Fig. 3G, genes 595-1282) for the Sub-cluster:

**BMP2 up-regulated**

| GO Term                                                                             | Count | p-Value  |
|-------------------------------------------------------------------------------------|-------|----------|
| GO:0007275~multicellular organismal development                                     | 68    | 3.96E-11 |
| GO:0007167~enzyme linked receptor protein signaling pathway                         | 22    | 1.16E-09 |
| GO:0032502~developmental process                                                    | 76    | 4.61E-09 |
| GO:0007154~cell communication                                                       | 73    | 1.16E-08 |
| GO:0030154~cell differentiation                                                     | 54    | 4.45E-08 |
| GO:0048869~cellular developmental process                                           | 54    | 4.45E-08 |
| GO:0007166~cell surface receptor linked signal transduction                         | 44    | 5.83E-08 |
| GO:0032501~multicellular organismal process                                         | 72    | 6.00E-08 |
| GO:0048731~system development                                                       | 51    | 1.40E-07 |
| GO:0048856~anatomical structure development                                         | 55    | 5.42E-07 |
| GO:0007165~signal transduction                                                      | 64    | 8.18E-07 |
| GO:0007507~heart development                                                        | 14    | 2.06E-06 |
| GO:0009887~organ morphogenesis                                                      | 23    | 4.91E-06 |
| GO:0048513~organ development                                                        | 41    | 5.38E-06 |
| GO:0009653~anatomical structure morphogenesis                                       | 36    | 9.75E-06 |
| GO:0048514~blood vessel morphogenesis                                               | 13    | 2.50E-05 |
| GO:0007178~transmembrane receptor protein serine/threonine kinase signaling pathway | 9     | 2.67E-05 |
| GO:0007399~nervous system development                                               | 24    | 4.06E-05 |
| GO:0048468~cell development                                                         | 35    | 5.64E-05 |
| GO:0001568~blood vessel development                                                 | 13    | 1.06E-04 |
| GO:0001944~vasculature development                                                  | 13    | 1.20E-04 |
| GO:0016477~cell migration                                                           | 14    | 3.30E-04 |
| GO:0007169~transmembrane receptor protein tyrosine kinase signaling pathway         | 11    | 3.38E-04 |
| GO:0009968~negative regulation of signal transduction                               | 8     | 4.97E-04 |
| GO:0048519~negative regulation of biological process                                | 28    | 9.44E-04 |
| GO:0030509~BMP signaling pathway                                                    | 5     | 1.02E-03 |
| GO:0051216~cartilage development                                                    | 6     | 1.07E-03 |

Table S21:

GO Terms obtained from the of hierarchical Cluster Analysis (Fig. 3G, genes 878-959) for the Sub-cluster:

**BMP2 down-regulated**

| GO Term                        | Count | p-Value  |
|--------------------------------|-------|----------|
| GO:0007165~signal transduction | 23    | 4.22E-04 |
| GO:0007154~cell communication  | 24    | 5.91E-04 |

Table S22:  
Significant GO Terms from functional Annotation Cluster (Fig. 4C) of all Genes regulated within following  
Treatment: **BMP2 6h**

| <b>GO Term</b>                                                                      | <b>Count</b> | <b>p-Value</b> |
|-------------------------------------------------------------------------------------|--------------|----------------|
| GO:0007154~cell communication                                                       | 63           | 4.80E-12       |
| GO:0007167~enzyme linked receptor protein signaling pathway                         | 18           | 5.46E-09       |
| GO:0007165~signal transduction                                                      | 52           | 5.85E-08       |
| GO:0007166~cell surface receptor linked signal transduction                         | 33           | 7.60E-07       |
| GO:0007178~transmembrane receptor protein serine/threonine kinase signaling pathway | 9            | 2.00E-06       |
| GO:0007389~pattern specification process                                            | 12           | 1.78E-05       |
| GO:0007399~nervous system development                                               | 20           | 2.01E-05       |
| GO:0007275~multicellular organismal development                                     | 41           | 3.74E-05       |
| GO:0048731~system development                                                       | 34           | 7.56E-05       |
| GO:0003002~regionalization                                                          | 9            | 8.66E-05       |
| GO:0048514~blood vessel morphogenesis                                               | 10           | 1.62E-04       |
| GO:0030154~cell differentiation                                                     | 34           | 2.21E-04       |
| GO:0048869~cellular developmental process                                           | 34           | 2.21E-04       |
| GO:0065007~biological regulation                                                    | 63           | 2.45E-04       |
| GO:0030509~BMP signaling pathway                                                    | 5            | 2.72E-04       |
| GO:0048856~anatomical structure development                                         | 36           | 3.21E-04       |
| GO:0048519~negative regulation of biological process                                | 23           | 3.66E-04       |
| GO:0050789~regulation of biological process                                         | 58           | 4.85E-04       |
| GO:0001568~blood vessel development                                                 | 10           | 4.89E-04       |
| GO:0001944~vasculature development                                                  | 10           | 5.36E-04       |
| GO:0032502~developmental process                                                    | 46           | 5.43E-04       |
| GO:0032501~multicellular organismal process                                         | 45           | 6.12E-04       |
| GO:0050793~regulation of developmental process                                      | 11           | 7.29E-04       |
| GO:0009888~tissue development                                                       | 11           | 7.86E-04       |
| GO:0048513~organ development                                                        | 27           | 8.46E-04       |
| GO:0051093~negative regulation of developmental process                             | 7            | 9.31E-04       |
| GO:0001525~angiogenesis                                                             | 8            | 9.35E-04       |
| GO:0048523~negative regulation of cellular process                                  | 21           | 9.82E-04       |

Table S23:  
Significant GO Terms from functional Annotation Cluster (Fig. 4D) of all Genes regulated within following  
Treatment: **BMP2 24h**

| <b>GO Term</b>                                                                      | <b>Count</b> | <b>p-Value</b> |
|-------------------------------------------------------------------------------------|--------------|----------------|
| GO:0007275~multicellular organismal development                                     | 113          | 3.13E-14       |
| GO:0032502~developmental process                                                    | 135          | 6.54E-14       |
| GO:0007154~cell communication                                                       | 127          | 2.93E-12       |
| GO:0048856~anatomical structure development                                         | 101          | 5.72E-12       |
| GO:0009653~anatomical structure morphogenesis                                       | 70           | 2.09E-11       |
| GO:0048731~system development                                                       | 88           | 9.15E-11       |
| GO:0007165~signal transduction                                                      | 115          | 1.08E-10       |
| GO:0007167~enzyme linked receptor protein signaling pathway                         | 31           | 1.78E-10       |
| GO:0007166~cell surface receptor linked signal transduction                         | 72           | 5.86E-10       |
| GO:0032501~multicellular organismal process                                         | 120          | 2.45E-09       |
| GO:0007399~nervous system development                                               | 45           | 4.12E-09       |
| GO:0009887~organ morphogenesis                                                      | 38           | 3.37E-08       |
| GO:0030154~cell differentiation                                                     | 84           | 3.92E-08       |
| GO:0048869~cellular developmental process                                           | 84           | 3.92E-08       |
| GO:0048514~blood vessel morphogenesis                                               | 22           | 5.01E-08       |
| GO:0016020~membrane                                                                 | 199          | 1.32E-07       |
| GO:0001568~blood vessel development                                                 | 23           | 1.51E-07       |
| GO:0001944~vasculature development                                                  | 23           | 1.88E-07       |
| GO:0007507~heart development                                                        | 19           | 1.46E-06       |
| GO:0048646~anatomical structure formation                                           | 20           | 2.00E-06       |
| GO:0044425~membrane part                                                            | 162          | 2.73E-06       |
| GO:0001525~angiogenesis                                                             | 17           | 3.03E-06       |
| GO:0000902~cell morphogenesis                                                       | 33           | 3.75E-06       |
| GO:0032989~cellular structure morphogenesis                                         | 33           | 3.75E-06       |
| GO:0048513~organ development                                                        | 64           | 4.11E-06       |
| GO:0048468~cell development                                                         | 58           | 4.55E-06       |
| GO:0005515~protein binding                                                          | 182          | 8.76E-06       |
| GO:0007411~axon guidance                                                            | 12           | 1.12E-05       |
| GO:0016477~cell migration                                                           | 23           | 1.18E-05       |
| GO:0007178~transmembrane receptor protein serine/threonine kinase signaling pathway | 12           | 1.25E-05       |
| GO:0022610~biological adhesion                                                      | 37           | 1.62E-05       |
| GO:0007155~cell adhesion                                                            | 37           | 1.62E-05       |
| GO:0030030~cell projection organization and biogenesis                              | 22           | 1.78E-05       |
| GO:0048858~cell projection morphogenesis                                            | 22           | 1.78E-05       |
| GO:0032990~cell part morphogenesis                                                  | 22           | 1.78E-05       |
| GO:0060089~molecular transducer activity                                            | 72           | 2.55E-05       |
| GO:0004871~signal transducer activity                                               | 72           | 2.55E-05       |
| GO:0022008~neurogenesis                                                             | 25           | 2.66E-05       |
| GO:0031175~neurite development                                                      | 18           | 2.80E-05       |
| GO:0048812~neurite morphogenesis                                                    | 16           | 5.39E-05       |
| GO:0048667~neuron morphogenesis during differentiation                              | 16           | 5.39E-05       |
| GO:0004872~receptor activity                                                        | 62           | 8.49E-05       |

continue

Table S23 (Part 2)

| <b>GO Term</b>                                                              | <b>Count</b> | <b>p-Value</b> |
|-----------------------------------------------------------------------------|--------------|----------------|
| GO:0003002~regionalization                                                  | 14           | 8.74E-05       |
| GO:0007409~axonogenesis                                                     | 15           | 8.98E-05       |
| GO:0030182~neuron differentiation                                           | 21           | 9.34E-05       |
| GO:0007389~pattern specification process                                    | 18           | 1.07E-04       |
| GO:0007169~transmembrane receptor protein tyrosine kinase signaling pathway | 16           | 1.18E-04       |
| GO:0048666~neuron development                                               | 18           | 1.31E-04       |
| GO:0030509~BMP signaling pathway                                            | 7            | 1.53E-04       |
| GO:0006928~cell motility                                                    | 23           | 1.61E-04       |
| GO:0051674~localization of cell                                             | 23           | 1.61E-04       |
| GO:0016021~integral to membrane                                             | 139          | 1.62E-04       |
| GO:0048699~generation of neurons                                            | 22           | 1.78E-04       |
| GO:0031224~intrinsic to membrane                                            | 139          | 2.03E-04       |
| GO:0000904~cellular morphogenesis during differentiation                    | 16           | 2.06E-04       |
| GO:0048754~branching morphogenesis of a tube                                | 9            | 2.16E-04       |
| GO:0048518~positive regulation of biological process                        | 46           | 2.51E-04       |
| GO:0001763~morphogenesis of a branching structure                           | 9            | 3.63E-04       |
| GO:0051094~positive regulation of developmental process                     | 10           | 3.98E-04       |
| GO:0030323~respiratory tube development                                     | 9            | 4.00E-04       |
| GO:0048522~positive regulation of cellular process                          | 41           | 4.67E-04       |
| GO:0021532~neural tube patterning                                           | 4            | 5.16E-04       |
| GO:0051216~cartilage development                                            | 8            | 5.44E-04       |
| GO:0019898~extrinsic to membrane                                            | 9            | 7.98E-04       |
| GO:0002062~chondrocyte differentiation                                      | 5            | 9.18E-04       |

Table S24:  
 Significant GO Terms from functional Annotation Cluster (Fig. 4A) of all Genes regulated within following  
 Treatment: **TSA 6h**

| <b>GO Term</b>                                                        | <b>Count</b> | <b>p-Value</b> |
|-----------------------------------------------------------------------|--------------|----------------|
| GO:0016569~covalent chromatin modification                            | 12           | 2.07E-06       |
| GO:0032502~developmental process                                      | 158          | 6.71E-06       |
| GO:0016573~histone acetylation                                        | 6            | 3.29E-05       |
| GO:0030154~cell differentiation                                       | 105          | 3.30E-05       |
| GO:0048869~cellular developmental process                             | 105          | 3.30E-05       |
| GO:0006325~establishment and/or maintenance of chromatin architecture | 25           | 3.37E-05       |
| GO:0005515~protein binding                                            | 270          | 3.61E-05       |
| GO:0006323~DNA packaging                                              | 25           | 5.30E-05       |
| GO:0006464~protein modification process                               | 92           | 7.20E-05       |
| GO:0016568~chromatin modification                                     | 20           | 7.88E-05       |
| GO:0005623~cell                                                       | 510          | 9.77E-05       |
| GO:0044464~cell part                                                  | 510          | 9.77E-05       |
| GO:0043412~biopolymer modification                                    | 94           | 1.12E-04       |
| GO:0051276~chromosome organization and biogenesis                     | 28           | 1.58E-04       |
| GO:0006915~apoptosis                                                  | 47           | 2.21E-04       |
| GO:0043687~post-translational protein modification                    | 80           | 2.40E-04       |
| GO:0006473~protein amino acid acetylation                             | 6            | 2.65E-04       |
| GO:0048468~cell development                                           | 73           | 2.79E-04       |
| GO:0016570~histone modification                                       | 9            | 2.97E-04       |
| GO:0043283~biopolymer metabolic process                               | 211          | 3.12E-04       |
| GO:0012501~programmed cell death                                      | 47           | 3.25E-04       |
| GO:0006996~organelle organization and biogenesis                      | 67           | 3.29E-04       |
| GO:0043543~protein amino acid acylation                               | 7            | 3.95E-04       |
| GO:0008219~cell death                                                 | 47           | 7.21E-04       |
| GO:0016265~death                                                      | 47           | 7.21E-04       |

Table S25:  
 Significant GO Terms from functional Annotation Cluster (Fig. 4B) of all Genes regulated within following  
 Treatment: **TSA 24h**

| <b>GO Term</b>                                                    | <b>Count</b> | <b>p-Value</b> |
|-------------------------------------------------------------------|--------------|----------------|
| GO:0032502~developmental process                                  | 180          | 6.66E-08       |
| GO:0005886~plasma membrane                                        | 118          | 1.05E-06       |
| GO:0007155~cell adhesion                                          | 56           | 2.16E-06       |
| GO:0022610~biological adhesion                                    | 56           | 2.16E-06       |
| GO:0030154~cell differentiation                                   | 117          | 4.52E-06       |
| GO:0048869~cellular developmental process                         | 117          | 4.52E-06       |
| GO:0048468~cell development                                       | 85           | 8.08E-06       |
| GO:0016020~membrane                                               | 318          | 8.10E-06       |
| GO:0048856~anatomical structure development                       | 122          | 5.11E-05       |
| GO:0000902~cell morphogenesis                                     | 43           | 6.33E-05       |
| GO:0032989~cellular structure morphogenesis                       | 43           | 6.33E-05       |
| GO:0042611~MHC protein complex                                    | 10           | 9.61E-05       |
| GO:0007399~nervous system development                             | 50           | 1.26E-04       |
| GO:0048731~system development                                     | 105          | 1.51E-04       |
| GO:0007275~multicellular organismal development                   | 127          | 3.39E-04       |
| GO:0044459~plasma membrane part                                   | 84           | 4.80E-04       |
| GO:0005539~glycosaminoglycan binding                              | 13           | 4.91E-04       |
| GO:0048002~antigen processing and presentation of peptide antigen | 8            | 8.15E-04       |
| GO:0043209~myelin sheath                                          | 4            | 8.29E-04       |

Table S26:  
 Significant GO Terms from functional Annotation Cluster (Fig. 4E) of all Genes regulated within following  
 Treatment: **BMP2 24h and TSA 24h**

| <b>GO Term</b>                                                                      | <b>Count</b> | <b>p-Value</b> |
|-------------------------------------------------------------------------------------|--------------|----------------|
| GO:0048856~anatomical structure development                                         | 35           | 1.04E-06       |
| GO:0000902~cell morphogenesis                                                       | 17           | 1.13E-06       |
| GO:0032989~cellular structure morphogenesis                                         | 17           | 1.13E-06       |
| GO:0007167~enzyme linked receptor protein signaling pathway                         | 13           | 2.13E-06       |
| GO:0032502~developmental process                                                    | 42           | 6.34E-06       |
| GO:0009653~anatomical structure morphogenesis                                       | 24           | 9.55E-06       |
| GO:0007154~cell communication                                                       | 40           | 1.57E-05       |
| GO:0007399~nervous system development                                               | 17           | 2.31E-05       |
| GO:0016020~membrane                                                                 | 65           | 2.51E-05       |
| GO:0042325~regulation of phosphorylation                                            | 6            | 1.44E-04       |
| GO:0007275~multicellular organismal development                                     | 32           | 1.63E-04       |
| GO:0019220~regulation of phosphate metabolic process                                | 6            | 1.76E-04       |
| GO:0051174~regulation of phosphorus metabolic process                               | 6            | 1.76E-04       |
| GO:0007165~signal transduction                                                      | 35           | 1.97E-04       |
| GO:0048731~system development                                                       | 27           | 2.07E-04       |
| GO:0006796~phosphate metabolic process                                              | 17           | 4.42E-04       |
| GO:0006793~phosphorus metabolic process                                             | 17           | 4.42E-04       |
| GO:0007178~transmembrane receptor protein serine/threonine kinase signaling pathway | 6            | 4.50E-04       |
| GO:0016310~phosphorylation                                                          | 15           | 6.81E-04       |
| GO:0001932~regulation of protein amino acid phosphorylation                         | 5            | 9.47E-04       |
